# Supplementary material
Source: PubMed Central journal article supplement (PMC7325686)
Supplement: NIHMS1588154-supplement-Propensity_Score.pdf [file NIHMS1588154-supplement-Propensity_Score.pdf]

# Propensity Score Analysis

Run Fan and Dan Ayers

July 30, 2018

## Contents

|          |                                                                                   |          |
|----------|-----------------------------------------------------------------------------------|----------|
| <b>1</b> | <b>Patient population</b>                                                         | <b>2</b> |
| <b>2</b> | <b>Linear Mixed Effect Model with Weighted Propensity Score</b>                   | <b>2</b> |
| 2.1      | Multiple Imputation for Baseline Values                                           | 2        |
| 2.2      | Model probability of treatment (propensity score)                                 | 2        |
| 2.2.1    | Calculation of Propensity Score                                                   | 2        |
| 2.2.2    | Calculation of Matching Weights                                                   | 2        |
| 2.2.3    | Plots of Estimated Propensity Score and Matching Weights by Treatment             | 3        |
| 2.2.4    | Weighting Scheme                                                                  | 3        |
| 2.3      | Summary Table 1                                                                   | 3        |
| 2.4      | Summary Table 2                                                                   | 5        |
| 2.5      | Summary of missingness for 8 continuous variables at 3 month visit                | 6        |
| 2.6      | SPADI Change Over Time by Treatment Groups (with 95% confidence interval)         | 7        |
| 2.7      | Identify the Best Model of SPADI Over Time                                        | 8        |
| 2.8      | Model Fit with Treatment and Weight                                               | 9        |
| 2.8.1    | No interaction model                                                              | 9        |
| 2.8.2    | Model with interaction                                                            | 9        |
| 2.8.3    | Model comparison                                                                  | 9        |
| 2.8.4    | Residual Plot of Final Model                                                      | 10       |
| 2.8.5    | Residual Plot of Final Model - histogram                                          | 11       |
| 2.8.6    | LMM Residual Plot of Final Model by Visit                                         | 12       |
| 2.8.7    | LS Means for Difference Between Operative and Non-operative Groups in Final Model | 13       |
| 2.8.8    | LS Means for Operative Group in Final Model                                       | 13       |
| 2.8.9    | LS Means for Non-operative Group in Final Model                                   | 14       |
| 2.9      | Model with interaction - 18 month data removed                                    | 15       |
| 2.9.1    | Model Fitting                                                                     | 15       |
| 2.9.2    | Residual Plot of Final Model                                                      | 15       |
| 2.9.3    | LS Means for Difference Between Operative and Non-operative Groups in Final Model | 16       |
| 2.9.4    | LS Means for Operative Group in Final Model                                       | 16       |
| 2.9.5    | LS Means for Non-operative Group in Final Model                                   | 17       |
| 2.10     | Model with square-root transformed outcome                                        | 18       |
| 2.10.1   | Model Fitting                                                                     | 18       |
| 2.10.2   | Residual Plot of Final Model                                                      | 18       |
| 2.10.3   | LS Means for Difference Between Operative and Non-operative Groups in Final Model | 19       |
| 2.10.4   | LS Means for Operative Group in Final Model                                       | 19       |
| 2.10.5   | LS Means for Non-operative Group in Final Model                                   | 20       |
| 2.11     | Model with square-root transformed outcome - 18 month data removed                | 21       |
| 2.11.1   | Model Fitting                                                                     | 21       |
| 2.11.2   | Residual Plot of Final Model                                                      | 21       |
| 2.11.3   | LS Means for Difference Between Operative and Non-operative Groups in Final Model | 22       |
| 2.11.4   | LS Means for Operative Group in Final Model                                       | 22       |
| 2.11.5   | LS Means for Non-operative Group in Final Model                                   | 23       |
| 2.12     | List of Patients in Final Model                                                   | 24       |

|          |                                                                  |           |
|----------|------------------------------------------------------------------|-----------|
| <b>3</b> | <b>Linear Mixed Effect Model with Selected Variables</b>         | <b>27</b> |
| 3.1      | Selected Variables in Full Model . . . . .                       | 27        |
| 3.2      | Redundancy Analysis for Selected Variables at Baseline . . . . . | 28        |
| 3.3      | Cluster Analysis for Selected Variables at Baseline . . . . .    | 29        |
| 3.4      | Model Fitting . . . . .                                          | 30        |
| 3.5      | Residual Plot of Final Model . . . . .                           | 31        |
| <b>4</b> | <b>Comparison of SPADI30 by Treatment</b>                        | <b>32</b> |
| <b>5</b> | <b>Comparison of SPADI50 by Treatment</b>                        | <b>32</b> |

# 1 Patient population

- The total sample size in clean dataset is 469.
- Exclude 79 patients that didn't return their baseline questionnaires (total sample size=390).
- Exclude 4 patients without degree of certainty information (total sample size=386).
- Exclude 228 baseline-only patients (total sample size=158).
- Among 158 patients, 138 of them are RCT+ (DOC+/MRI+ or DOC+/MRI missing). 5 patients are RCT- (DOC-). 15 patients are RCT missing (DOC+/MRI-).
- Among 138 RCT+ patients, 77 of them are non-operative (group2:non-operative and group6: delayed surgery without surgery date). 50 of them are operative group.
- 7 patients missing baseline SPADI score were excluded in non-operative predictor manuscript and PT variability manuscript. These 7 patients were included in current analysis. The sample size is 127.

# 2 Linear Mixed Effect Model with Weighted Propensity Score

## 2.1 Multiple Imputation for Baseline Values

- Missingness in our dataset is Missing At Random (MAR).
- Multiple Imputation (MI) was implemented using the "aregImpute" function in *Hmisc* R package for predictor imputation.
- MI imputes missing variables using the Predictive Mean Matching (PMM) method with weighted probability sampling of available data. All 24 predictors, including baseline SPADI, were included in MI procedure. SPADI at follow-up and treatment information were not included in MI.
- MI was repeated for 20 times to account for potential variability introduced by imputation. All imputed "complete" datasets were saved.

## 2.2 Model probability of treatment (propensity score)

### 2.2.1 Calculation of Propensity Score

- The propensity score is each patient's predicted probability of being assigned to surgical group, given the estimates from the logit model. Covariates that are related to both the treatment assignments and potential outcomes are included. (all 24 covariates)

$$\begin{aligned}
 \text{logit}(e_i) = & \beta_0 + \beta_1 * \text{age}_i + \beta_2 * \text{BicepsTendonitis}_i + \beta_3 * \text{Boileau}_i + \beta_4 * \text{DailyShoulderUseAtWork}_i \\
 & + \beta_5 * \text{DoYouDrinkAlcohol}_i + \beta_6 * \text{Education}_i + \beta_7 * \text{ExternalRotationRatio}_i + \beta_8 * \text{FABQ}_i \\
 & + \beta_9 * \text{FattyInfiltration}_i + \beta_{10} * \text{Gender}_i + \beta_{11} * \text{Infraspinatus}_i + \beta_{12} * \text{DominantAffected}_i \\
 & + \beta_{13} * \text{IsolatedAbductionRatio}_i + \beta_{14} * \text{MaritalStatus}_i + \beta_{15} * \text{MHI}_i + \beta_{16} * \text{Comorbidities}_i \\
 & + \beta_{17} * \text{NumOfTorn}_i + \beta_{18} * \text{SmokingStatus}_i + \beta_{19} * \text{Trauma}_i + \beta_{20} * \text{SymptomDuration}_i \\
 & + \beta_{21} * \text{BaselineSPADI}_i + \beta_{22} * \text{CrossArea}_i + \beta_{23} * \text{FullTear}_i + \beta_{24} * \text{Expectation}_i
 \end{aligned}$$

- Final propensity score is the average predicted value from all imputation datasets.

### 2.2.2 Calculation of Matching Weights

- Matched weights for treatment group:

$$\min\{e_i, 1 - e_i\}/e_i$$

- Matched weights for control group:

$$\min\{e_i, 1 - e_i\}/(1 - e_i)$$

### 2.2.3 Plots of Estimated Propensity Score and Matching Weights by Treatment

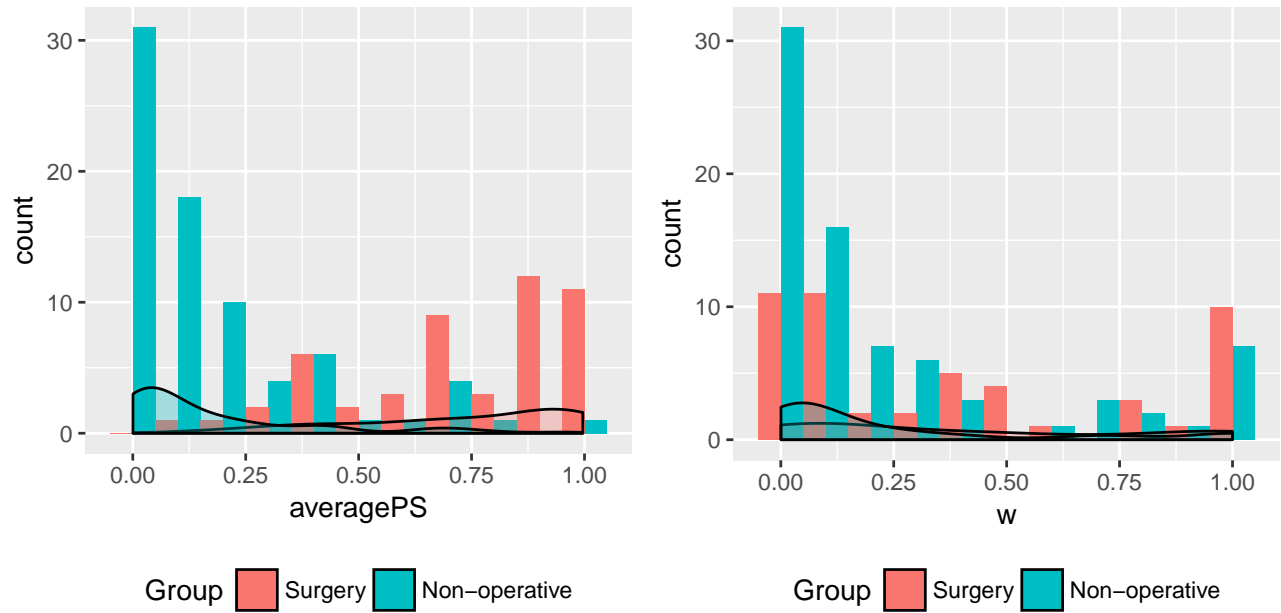

### 2.2.4 Weighting Scheme

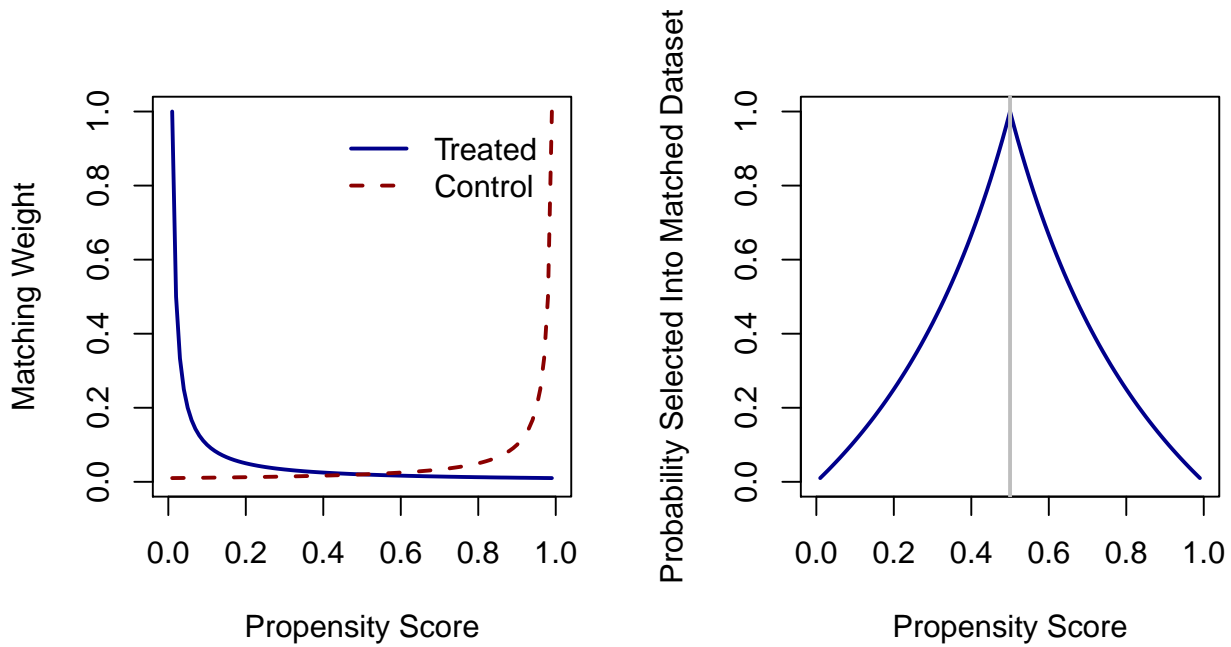

### 2.3 Summary Table 1

|                                     |   | before weighting |               |       | after weighting |               |       |
|-------------------------------------|---|------------------|---------------|-------|-----------------|---------------|-------|
|                                     |   | Surgery          | Non-operative | SMD   | Surgery         | Non-operative | SMD   |
| Age (mean(sd))                      |   | 59.89 (8.65)     | 62.24 (8.10)  | 0.534 | 62.57 (6.66)    | 57.45 (6.70)  | 0.038 |
| Biceps tendonitis/tenosynovitis (%) | 1 | 35.0 (70.0)      | 54.0 (70.1)   | 0.003 | 14.5 (72.1)     | 13.9 (74.7)   | 0.060 |
|                                     | 2 | 15.0 (30.0)      | 23.0 (29.9)   |       | 5.6 (27.9)      | 4.7 (25.3)    |       |
| Boileau (%)                         | 1 | 29.0 (60.4)      | 49.0 (79.0)   | 0.414 | 11.3 (60.5)     | 9.5 (58.9)    | 0.032 |
|                                     | 2 | 19.0 (39.6)      | 13.0 (21.0)   |       | 7.4 (39.5)      | 6.6 (41.1)    |       |
| Daily shoulder use at work (%)      | 1 | 37.0 (75.5)      | 63.0 (81.8)   | 0.154 | 15.8 (79.9)     | 14.8 (79.6)   | 0.008 |
|                                     | 2 | 12.0 (24.5)      | 14.0 (18.2)   |       | 4.0 (20.1)      | 3.8 (20.4)    |       |
| Do you drink alcohol? (%)           | 1 | 18.0 (37.5)      | 43.0 (56.6)   | 0.389 | 9.6 (50.8)      | 9.5 (51.6)    | 0.015 |
|                                     | 2 | 30.0 (62.5)      | 33.0 (43.4)   |       | 9.3 (49.2)      | 8.9 (48.4)    |       |
| Education (%)                       | 1 | 16.0 (33.3)      | 26.0 (34.2)   | 0.019 | 6.0 (31.6)      | 6.7 (36.4)    | 0.101 |
|                                     | 2 | 32.0 (66.7)      | 50.0 (65.8)   |       | 12.9 (68.4)     | 11.7 (63.6)   |       |
| external rotation ratio (mean(sd))  |   | 0.52 (0.30)      | 0.83 (0.42)   | 0.768 | 0.65 (0.33)     | 0.70 (0.30)   | 0.105 |
| FABQ (mean(sd))                     |   | 18.89 (4.30)     | 16.36 (6.06)  | 0.495 | 17.75 (4.94)    | 17.05 (4.91)  | 0.050 |
| Fatty infiltration (%)              | 1 | 23.0 (54.8)      | 41.0 (71.9)   | 0.362 | 8.4 (51.6)      | 8.9 (58.9)    | 0.147 |
|                                     | 2 | 19.0 (45.2)      | 16.0 (28.1)   |       | 7.8 (48.4)      | 6.2 (41.1)    |       |
| Gender (%)                          | 1 | 19.0 (38.0)      | 39.0 (50.6)   | 0.257 | 9.1 (45.6)      | 8.3 (44.7)    | 0.017 |
|                                     | 2 | 31.0 (62.0)      | 38.0 (49.4)   |       | 10.9 (54.4)     | 10.3 (55.3)   |       |
| Infraspinatus (%)                   | 1 | 29.0 (60.4)      | 45.0 (72.6)   | 0.260 | 10.0 (53.7)     | 9.3 (57.5)    | 0.077 |
|                                     | 2 | 19.0 (39.6)      | 17.0 (27.4)   |       | 8.6 (46.3)      | 6.9 (42.5)    |       |
| Is dominant shoulder affected? (%)  | 1 | 11.0 (22.9)      | 18.0 (24.7)   | 0.041 | 5.7 (29.0)      | 5.4 (30.1)    | 0.023 |
|                                     | 2 | 37.0 (77.1)      | 55.0 (75.3)   |       | 14.0 (71.0)     | 12.5 (69.9)   |       |
| Isolated abduction ratio (mean(sd)) |   | 0.86 (0.21)      | 0.89 (0.19)   | 0.110 | 0.87 (0.20)     | 0.88 (0.21)   | 0.041 |
| Marital status (%)                  | 1 | 11.0 (22.0)      | 21.0 (28.0)   | 0.139 | 5.5 (27.5)      | 4.8 (26.1)    | 0.032 |
|                                     | 2 | 39.0 (78.0)      | 54.0 (72.0)   |       | 14.5 (72.5)     | 13.6 (73.9)   |       |
| MHI-5 (mean(sd))                    |   | 80.24 (18.82)    | 81.79 (13.80) | 0.013 | 80.59 (17.86)   | 86.97 (9.56)  | 0.035 |
| Number of Comorbidities (%)         | 1 | 29.0 (58.0)      | 34.0 (44.2)   | 0.280 | 9.8 (48.9)      | 9.6 (51.3)    | 0.048 |
|                                     | 2 | 21.0 (42.0)      | 43.0 (55.8)   |       | 10.3 (51.1)     | 9.1 (48.7)    |       |
| Number of torn (%)                  | 1 | 29.0 (60.4)      | 44.0 (71.0)   | 0.224 | 9.9 (53.0)      | 9.2 (57.1)    | 0.083 |
|                                     | 2 | 19.0 (39.6)      | 18.0 (29.0)   |       | 8.8 (47.0)      | 6.9 (42.9)    |       |
| Smoking Status (%)                  | 1 | 24.0 (50.0)      | 37.0 (48.7)   | 0.026 | 8.9 (47.2)      | 8.7 (47.3)    | 0.002 |
|                                     | 2 | 24.0 (50.0)      | 39.0 (51.3)   |       | 10.0 (52.8)     | 9.7 (52.7)    |       |
| Trauma (%)                          | 1 | 23.0 (46.0)      | 42.0 (59.2)   | 0.266 | 9.6 (47.9)      | 7.4 (45.2)    | 0.055 |
|                                     | 2 | 27.0 (54.0)      | 29.0 (40.8)   |       | 10.5 (52.1)     | 9.0 (54.8)    |       |
| Symptom Duration (mean(sd))         |   | 24.27 (43.52)    | 23.54 (42.98) | 0.048 | 26.19 (50.59)   | 33.74 (61.19) | 0.035 |
| SPADI at baseline (mean(sd))        |   | 57.49 (20.10)    | 42.97 (20.99) | 0.493 | 51.62 (20.20)   | 39.81 (18.23) | 0.025 |
| Cross-sectional Area (mean(sd))     |   | 14.73 (19.29)    | 8.38 (16.44)  | 0.376 | 14.79 (22.55)   | 21.73 (24.34) | 0.039 |
| Full tear of any tendons? (%)       | 1 | 5.0 (10.4)       | 28.0 (45.2)   | 0.841 | 2.8 (15.2)      | 2.5 (15.4)    | 0.005 |
|                                     | 2 | 43.0 (89.6)      | 34.0 (54.8)   |       | 15.8 (84.8)     | 13.7 (84.6)   |       |
| Patient Expectation (%)             | 1 | 47.0 (94.0)      | 49.0 (65.3)   | 0.762 | 17.5 (87.4)     | 15.8 (85.2)   | 0.067 |
|                                     | 2 | 3.0 ( 6.0)       | 26.0 (34.7)   |       | 2.5 (12.6)      | 2.8 (14.8)    |       |

## 2.4 Summary Table 2

|                                | Surgery  |      |      |                   | Non-operative |      |      |                   | Combined  |      |      |                   |
|--------------------------------|----------|------|------|-------------------|---------------|------|------|-------------------|-----------|------|------|-------------------|
|                                | $N = 50$ |      |      |                   | $N = 77$      |      |      |                   | $N = 127$ |      |      |                   |
| Age                            | 51.6     | 59.1 | 64.6 | (59.3 $\pm$ 8.9)  | 59.3          | 64.6 | 68.6 | (63.8 $\pm$ 8.3)  | 54.8      | 63.0 | 67.9 | (62.0 $\pm$ 8.8)  |
| Biceps tendonitis              |          |      |      |                   |               |      |      |                   |           |      |      |                   |
| 1                              |          |      | 70%  | (35)              |               |      | 70%  | (54)              |           |      | 70%  | (89)              |
| 2                              |          |      | 30%  | (15)              |               |      | 30%  | (23)              |           |      | 30%  | (38)              |
| Boileau                        |          |      |      |                   |               |      |      |                   |           |      |      |                   |
| 1                              |          |      | 58%  | (29)              |               |      | 64%  | (49)              |           |      | 61%  | (78)              |
| 2                              |          |      | 38%  | (19)              |               |      | 17%  | (13)              |           |      | 25%  | (32)              |
| NA                             |          |      | 4%   | (2)               |               |      | 19%  | (15)              |           |      | 13%  | (17)              |
| Daily shoulder use at work     |          |      |      |                   |               |      |      |                   |           |      |      |                   |
| 1                              |          |      | 74%  | (37)              |               |      | 82%  | (63)              |           |      | 79%  | (100)             |
| 2                              |          |      | 24%  | (12)              |               |      | 18%  | (14)              |           |      | 20%  | (26)              |
| NA                             |          |      | 2%   | (1)               |               |      | 0%   | (0)               |           |      | 1%   | (1)               |
| Do you drink alcohol?          |          |      |      |                   |               |      |      |                   |           |      |      |                   |
| 1                              |          |      | 36%  | (18)              |               |      | 56%  | (43)              |           |      | 48%  | (61)              |
| 2                              |          |      | 60%  | (30)              |               |      | 43%  | (33)              |           |      | 50%  | (63)              |
| NA                             |          |      | 4%   | (2)               |               |      | 1%   | (1)               |           |      | 2%   | (3)               |
| Education                      |          |      |      |                   |               |      |      |                   |           |      |      |                   |
| 1                              |          |      | 32%  | (16)              |               |      | 34%  | (26)              |           |      | 33%  | (42)              |
| 2                              |          |      | 64%  | (32)              |               |      | 65%  | (50)              |           |      | 65%  | (82)              |
| NA                             |          |      | 4%   | (2)               |               |      | 1%   | (1)               |           |      | 2%   | (3)               |
| External Rotation Ratio        | 0.31     | 0.51 | 0.71 | (0.54 $\pm$ 0.29) | 0.59          | 0.76 | 0.98 | (0.83 $\pm$ 0.45) | 0.49      | 0.68 | 0.91 | (0.72 $\pm$ 0.42) |
| FABQ                           | 17.0     | 19.0 | 22.8 | (19.0 $\pm$ 4.3)  | 12.0          | 18.0 | 21.0 | (16.4 $\pm$ 6.1)  | 15.0      | 18.5 | 21.0 | (17.5 $\pm$ 5.6)  |
| Fatty infiltration             |          |      |      |                   |               |      |      |                   |           |      |      |                   |
| 1                              |          |      | 46%  | (23)              |               |      | 53%  | (41)              |           |      | 50%  | (64)              |
| 2                              |          |      | 38%  | (19)              |               |      | 21%  | (16)              |           |      | 28%  | (35)              |
| NA                             |          |      | 16%  | (8)               |               |      | 26%  | (20)              |           |      | 22%  | (28)              |
| Gender                         |          |      |      |                   |               |      |      |                   |           |      |      |                   |
| 1                              |          |      | 38%  | (19)              |               |      | 51%  | (39)              |           |      | 46%  | (58)              |
| 2                              |          |      | 62%  | (31)              |               |      | 49%  | (38)              |           |      | 54%  | (69)              |
| Infraspinatus                  |          |      |      |                   |               |      |      |                   |           |      |      |                   |
| 1                              |          |      | 58%  | (29)              |               |      | 58%  | (45)              |           |      | 58%  | (74)              |
| 2                              |          |      | 38%  | (19)              |               |      | 22%  | (17)              |           |      | 28%  | (36)              |
| NA                             |          |      | 4%   | (2)               |               |      | 19%  | (15)              |           |      | 13%  | (17)              |
| Is dominant shoulder affected? |          |      |      |                   |               |      |      |                   |           |      |      |                   |
| 1                              |          |      | 22%  | (11)              |               |      | 23%  | (18)              |           |      | 23%  | (29)              |
| 2                              |          |      | 74%  | (37)              |               |      | 71%  | (55)              |           |      | 72%  | (92)              |
| NA                             |          |      | 4%   | (2)               |               |      | 5%   | (4)               |           |      | 5%   | (6)               |
| Isolated Abduction Ratio       | 0.76     | 0.94 | 1.00 | (0.87 $\pm$ 0.20) | 0.80          | 0.94 | 1.00 | (0.89 $\pm$ 0.18) | 0.79      | 0.94 | 1.00 | (0.88 $\pm$ 0.19) |
| Marital status                 |          |      |      |                   |               |      |      |                   |           |      |      |                   |
| 1                              |          |      | 22%  | (11)              |               |      | 27%  | (21)              |           |      | 25%  | (32)              |
| 2                              |          |      | 78%  | (39)              |               |      | 70%  | (54)              |           |      | 73%  | (93)              |
| NA                             |          |      | 0%   | (0)               |               |      | 3%   | (2)               |           |      | 2%   | (2)               |
| MHI-5                          | 76       | 85   | 90   | (80 $\pm$ 17)     | 75            | 85   | 90   | (80 $\pm$ 15)     | 75        | 85   | 90   | (80 $\pm$ 16)     |

$a$   $b$   $c$  represent the lower quartile  $a$ , the median  $b$ , and the upper quartile  $c$  for continuous variables.  $x \pm s$  represents  $\bar{X} \pm 1$  SD. Numbers after percents are frequencies.

|                           | Surgery<br><i>N</i> = 50       | Non-operative<br><i>N</i> = 77 | Combined<br><i>N</i> = 127     |
|---------------------------|--------------------------------|--------------------------------|--------------------------------|
| Number of comorbidities   |                                |                                |                                |
| 1                         | 58% (29)                       | 44% (34)                       | 50% (63)                       |
| 2                         | 42% (21)                       | 56% (43)                       | 50% (64)                       |
| Number of torn            |                                |                                |                                |
| 1                         | 58% (29)                       | 57% (44)                       | 57% (73)                       |
| 2                         | 38% (19)                       | 23% (18)                       | 29% (37)                       |
| NA                        | 4% (2)                         | 19% (15)                       | 13% (17)                       |
| Smoking status            |                                |                                |                                |
| 1                         | 48% (24)                       | 48% (37)                       | 48% (61)                       |
| 2                         | 48% (24)                       | 51% (39)                       | 50% (63)                       |
| NA                        | 4% (2)                         | 1% (1)                         | 2% (3)                         |
| Trauma                    |                                |                                |                                |
| 1                         | 46% (23)                       | 55% (42)                       | 51% (65)                       |
| 2                         | 54% (27)                       | 38% (29)                       | 44% (56)                       |
| NA                        | 0% (0)                         | 8% (6)                         | 5% (6)                         |
| When did problem start?   | 2.2 6.0 18.0 (22.6 ±40.6)      | 4.0 6.0 18.0 (24.9 ±54.3)      | 3.2 6.0 18.0 (23.9 ±49.0)      |
| SPADI at Baseline         | 41 59 68 (55 ±21)              | 26 40 58 (44 ±23)              | 29 46 65 (49 ±23)              |
| Cross-sectional area      | 1.82 3.23 20.86 (14.48 ±19.35) | 0.00 0.72 4.40 ( 7.93 ±15.34)  | 0.00 2.21 12.03 (10.88 ±17.48) |
| Full tear of any tendons? |                                |                                |                                |
| 1                         | 10% (5)                        | 36% (28)                       | 26% (33)                       |
| 2                         | 86% (43)                       | 44% (34)                       | 61% (77)                       |
| NA                        | 4% (2)                         | 19% (15)                       | 13% (17)                       |
| Patient expectation       |                                |                                |                                |
| 1                         | 94% (47)                       | 64% (49)                       | 76% (96)                       |
| 2                         | 6% (3)                         | 34% (26)                       | 23% (29)                       |
| NA                        | 0% (0)                         | 3% (2)                         | 2% (2)                         |

$a$   $b$   $c$  represent the lower quartile  $a$ , the median  $b$ , and the upper quartile  $c$  for continuous variables.  $x \pm s$  represents  $\bar{X} \pm 1$  SD. Numbers after percents are frequencies.

## 2.5 Summary of missingness for 8 continuous variables at 3 month visit

| df                       | of missing | Percent of missing (%) |
|--------------------------|------------|------------------------|
| baseline SPADI           | 7          | 5.51                   |
| Age                      | 0          | 0.00                   |
| External rotation ratio  | 8          | 6.30                   |
| FABQ                     | 5          | 3.94                   |
| Isolated abduction ratio | 10         | 7.87                   |
| MHI-5                    | 2          | 1.57                   |
| When did problem start   | 5          | 3.94                   |
| cross-sectional area     | 27         | 21.26                  |

## 2.6 SPADI Change Over Time by Treatment Groups (with 95% confidence interval)

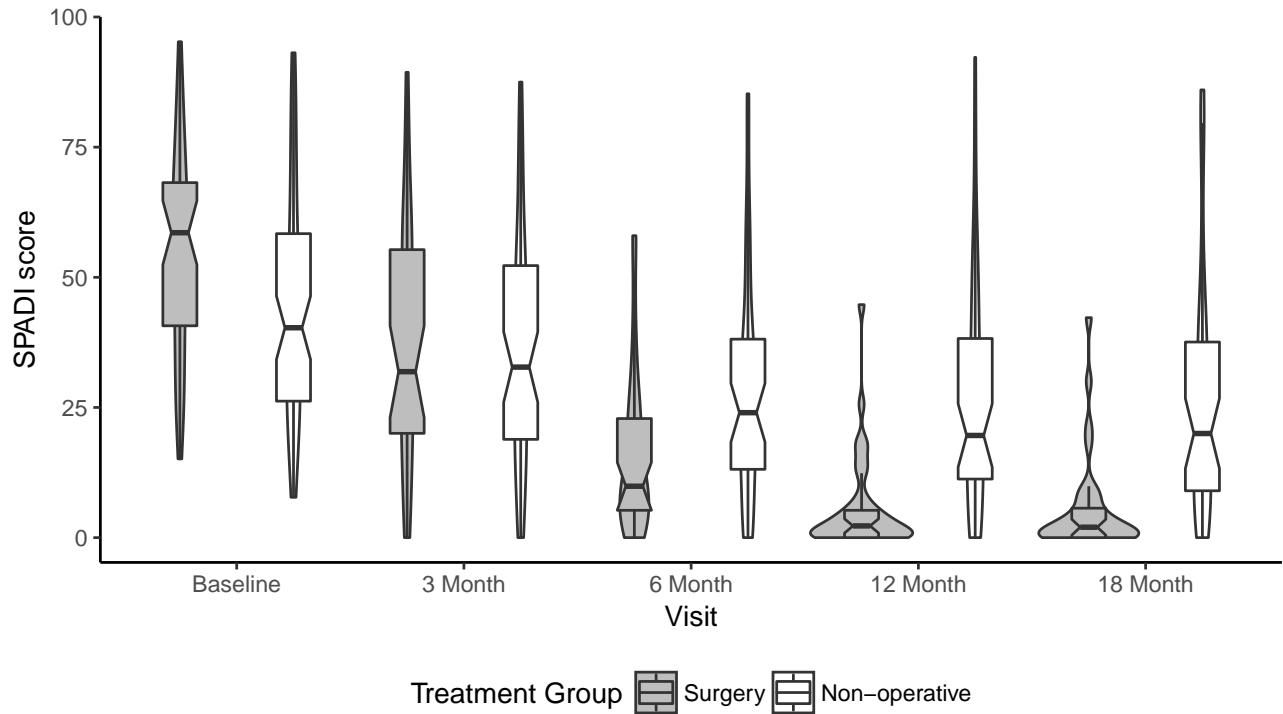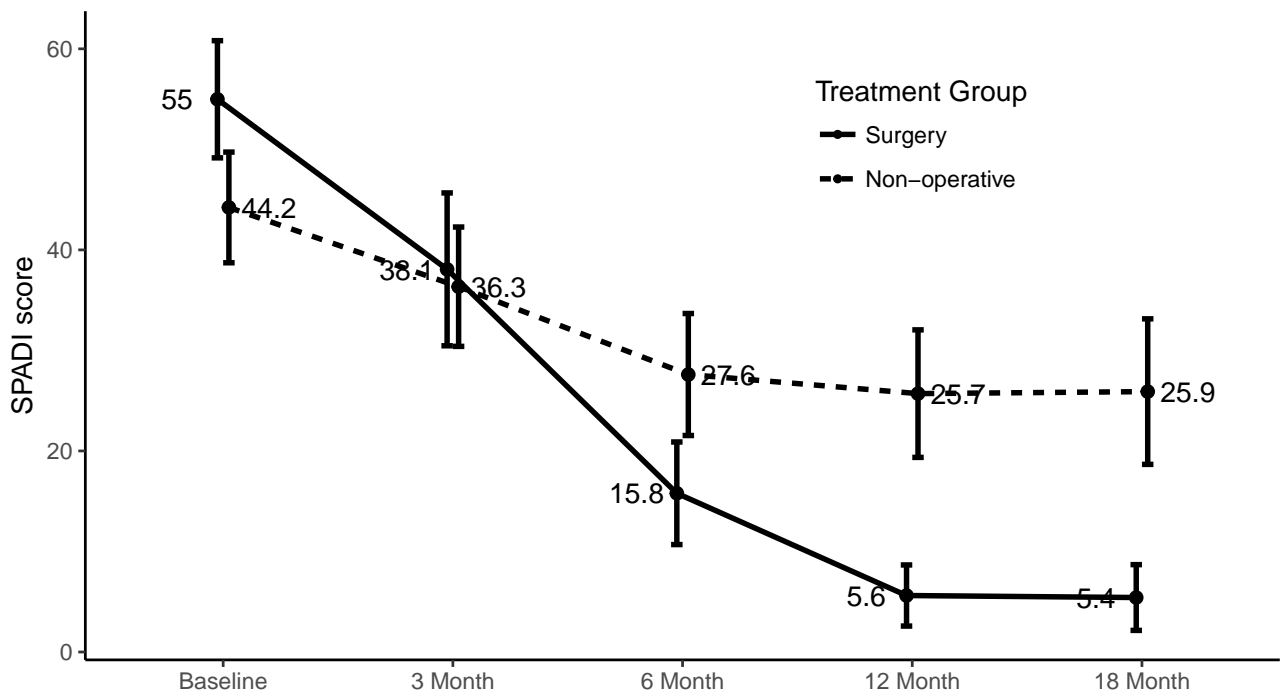



| tab      | Surgery | Non-operative | Difference | Lower CI | Upper CI | P value |
|----------|---------|---------------|------------|----------|----------|---------|
| Baseline | 54.983  | 44.223        | 10.759     | 3.375    | 20.500   | 0.007   |
| 3 Month  | 38.062  | 36.338        | 1.725      | -8.500   | 11.125   | 0.627   |
| 6 Month  | 15.787  | 27.601        | -11.814    | -18.125  | -3.250   | 0.004   |
| 12 Month | 5.618   | 25.702        | -20.083    | -22.875  | -10.875  | 0.000   |
| 18 Month | 5.419   | 25.902        | -20.483    | -22.500  | -8.375   | 0.000   |

## 2.7 Identify the Best Model of SPADI Over Time

- Fit1:  $\text{spadi} \sim \text{visit} + \text{visit}^2$ , numeric visit, compound symmetry correlation structure. AIC for fit1 is 3485.02.
- Fit2:  $\text{spadi} \sim \text{visit} + \text{visit}^2$ , numeric visit, AR(1) Correlation Structure. AIC for fit2 is 3525.95
- Fit3:  $\text{spadi} \sim \text{visit}$ , visit as factor variable, compound symmetry correlation structure. AIC for fit3 is 3482.4
- Fit4:  $\text{spadi} \sim \text{visit}$ , visit as factor variable, AR(1) Correlation Structure. AIC for fit4 is 3522.04
- AIC for models with numeric and categorical visit is very similar. Compound symmetry correlation structure yields smaller AIC than AR(1) correlation structure.

## 2.8 Model Fit with Treatment and Weight

### 2.8.1 No interaction model

```
##               lower est. upper p.value
## (Intercept)    16.72  25.1  33.4  0.000
## visit_new6 Month    -9.45  -6.7  -4.0  0.000
## visit_new12 Month   -9.29  -6.6  -4.0  0.000
## visit_new18 Month  -13.00 -10.1  -7.2  0.000
## operative_newNon-operative  0.25  10.2  20.2  0.046
```

### 2.8.2 Model with interaction

```
##               lower est. upper p.value
## (Intercept)          38  47  56.4  0.000
## visit_new6 Month    -43  -34 -25.6  0.000
## visit_new12 Month   -52  -43 -34.6  0.000
## visit_new18 Month   -52  -42 -32.8  0.000
## operative_newNon-operative -24 -14  -2.7  0.016
## visit_new6 Month:operative_newNon-operative  21  30  38.8  0.000
## visit_new12 Month:operative_newNon-operative  31  40  48.5  0.000
## visit_new18 Month:operative_newNon-operative  25  35  44.6  0.000
```

### 2.8.3 Model comparison

```
##      Model df  AIC  BIC logLik  Test L.Ratio p-value
## finalfit1    1  8 3520 3551  -1752
## finalfit2    2 11 3448 3490 -1713 1 vs 2    78 <.0001
```

- Model with visit and treatment interaction is the final model.

## 2.8.4 Residual Plot of Final Model

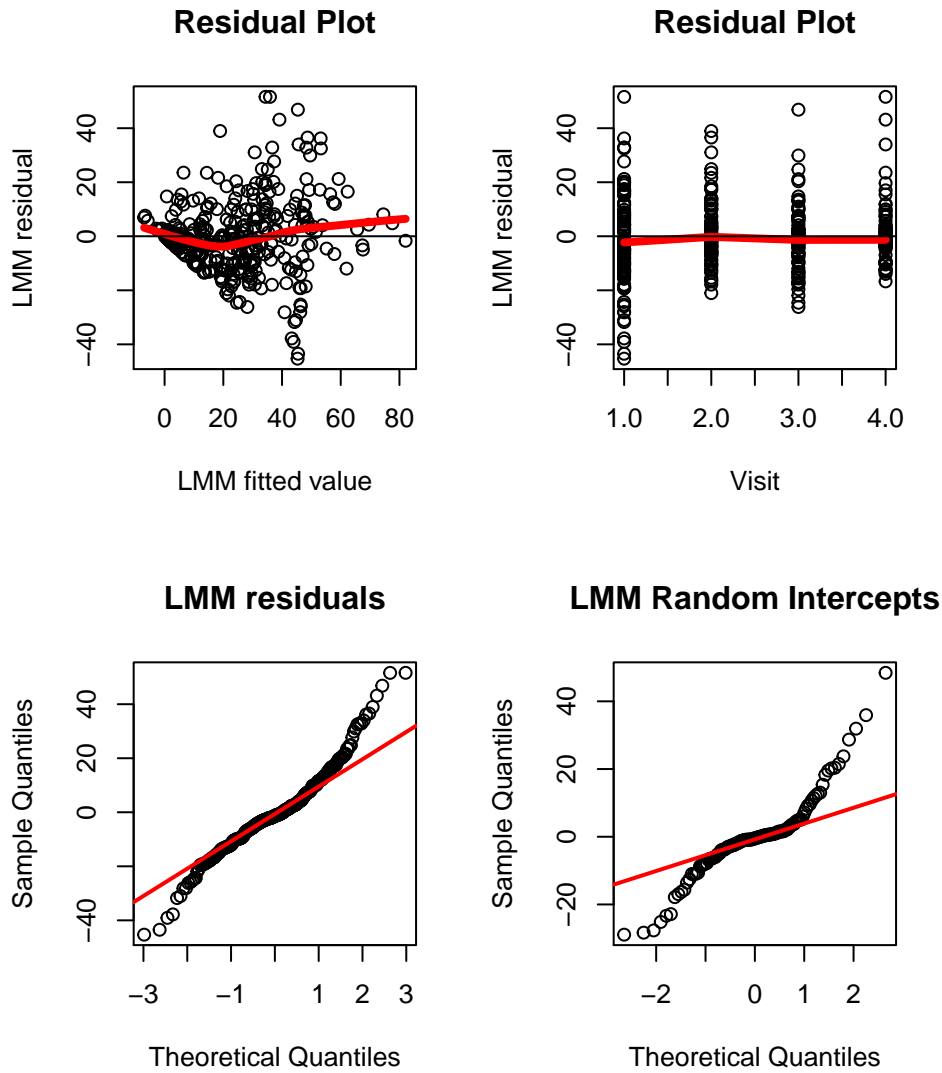

- Anderson-Darling normality test for LMM residuals is  $9.76 \times 10^{-11}$ .
- Anderson-Darling normality test for LMM random intercepts is  $4.48 \times 10^{-12}$ .

### 2.8.5 Residual Plot of Final Model - histogram

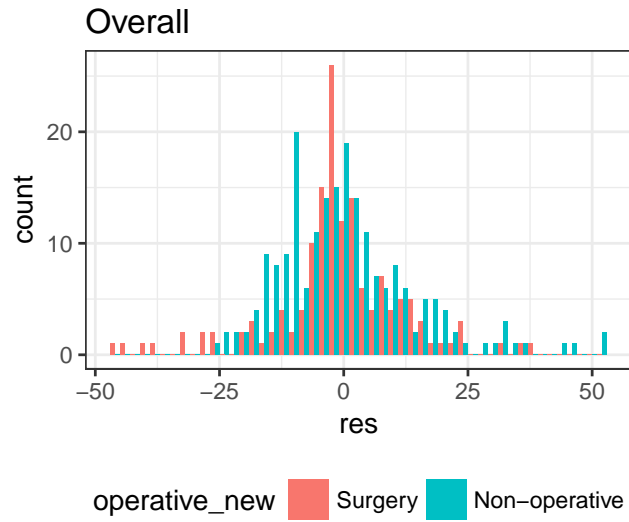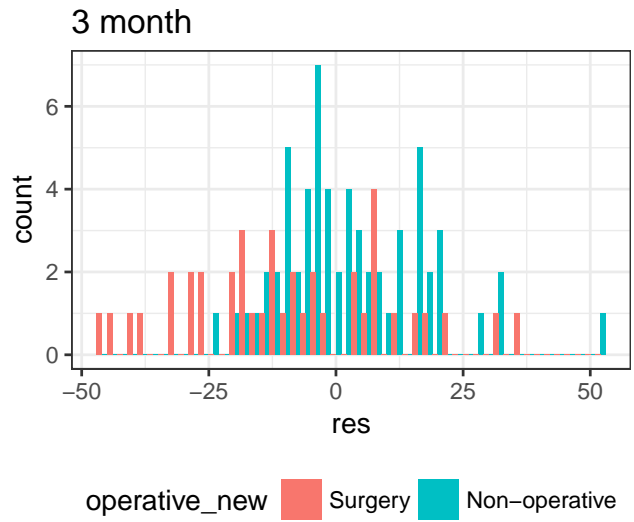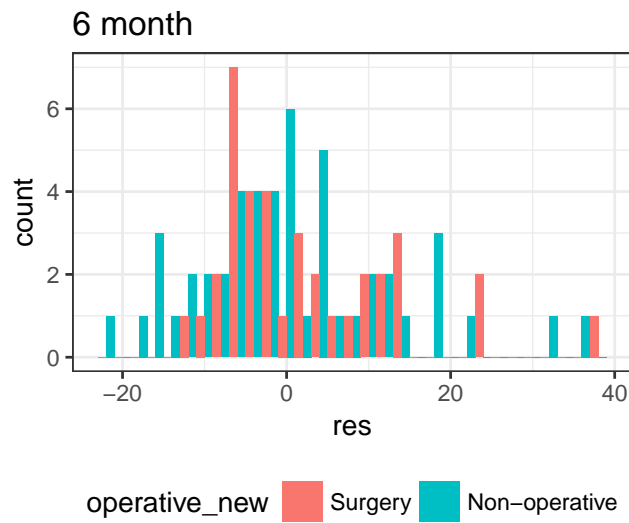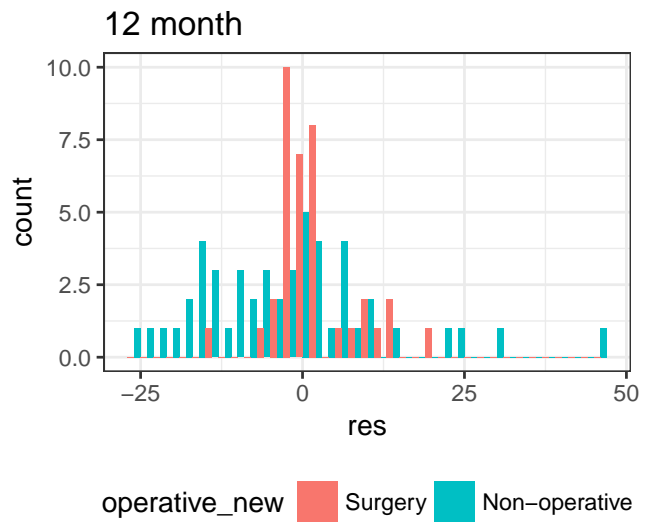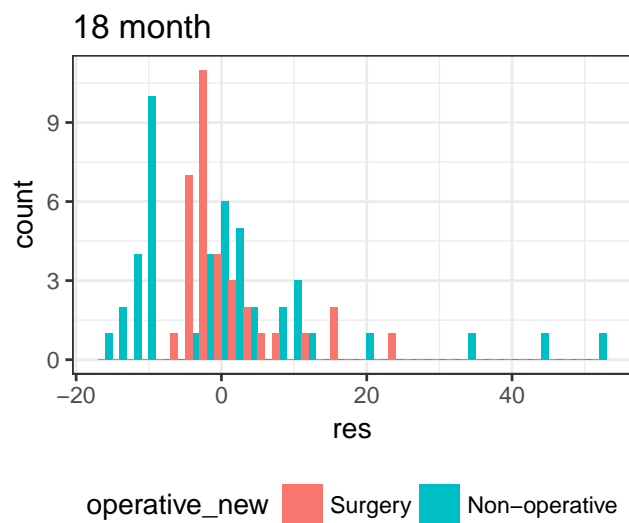

## 2.8.6 LMM Residual Plot of Final Model by Visit

LMM residuals at 3 month

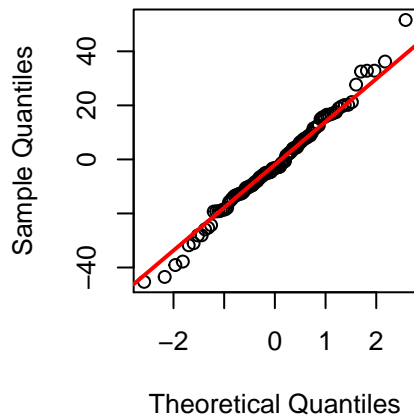

LMM residuals at 6 month

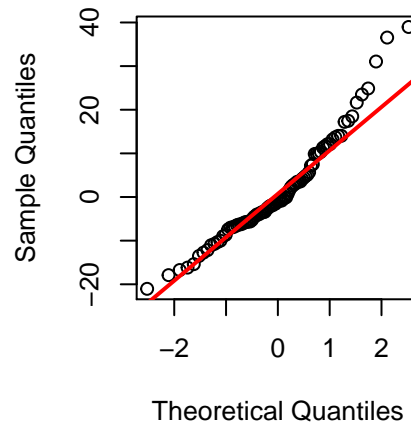

LMM residuals at 12 month

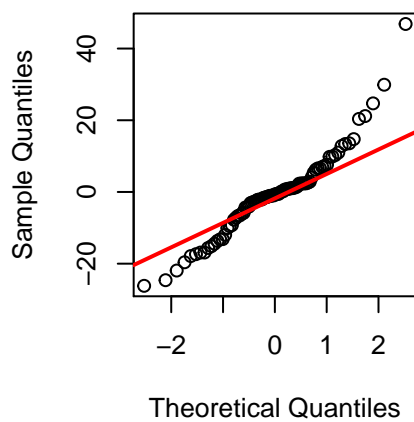

LMM residuals at 18 month

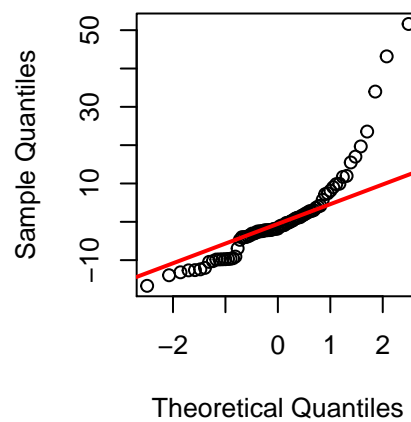

- Anderson-Darling normality test for LMM residuals at 3 month is 0.5583.
- Anderson-Darling normality test for LMM residuals at 6 month is 0.0016.
- Anderson-Darling normality test for LMM residuals at 12 month is  $7.0783 \times 10^{-4}$ .
- Anderson-Darling normality test for LMM residuals at 18 month is  $3.8864 \times 10^{-9}$ .

### 2.8.7 LS Means for Difference Between Operative and Non-operative Groups in Final Model

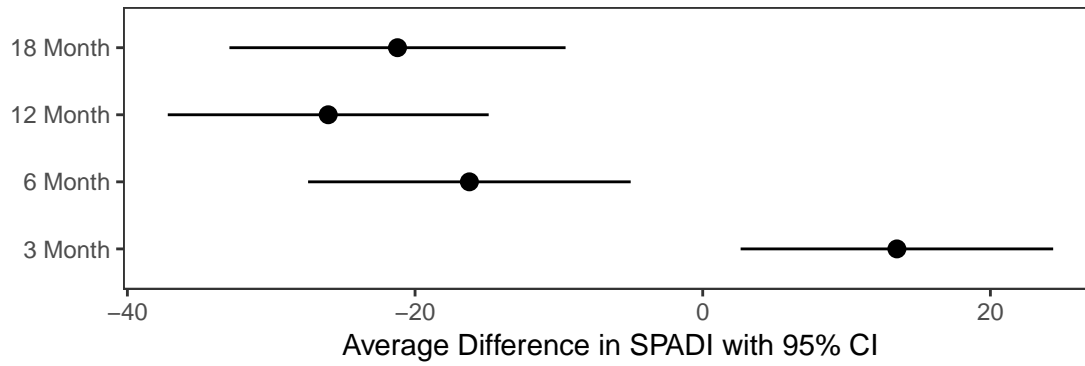

| contrast                | visit <sub>n</sub> ew | estimate | SE  | df  | t.ratio | p.value | upper | lower |
|-------------------------|-----------------------|----------|-----|-----|---------|---------|-------|-------|
| Surgery - Non-operative | 3 Month               | 14       | 5.5 | 122 | 2.4     | 1.6e-02 | 24.4  | 2.6   |
| Surgery - Non-operative | 6 Month               | -16      | 5.7 | 122 | -2.8    | 5.4e-03 | -5.0  | -27.4 |
| Surgery - Non-operative | 12 Month              | -26      | 5.7 | 122 | -4.6    | 1.2e-05 | -14.9 | -37.2 |
| Surgery - Non-operative | 18 Month              | -21      | 6.0 | 122 | -3.6    | 5.3e-04 | -9.5  | -32.9 |

### 2.8.8 LS Means for Operative Group in Final Model

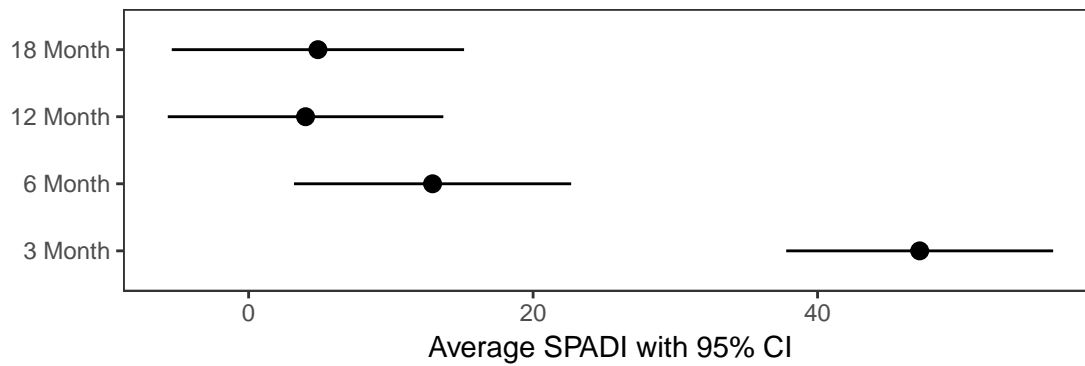

| operative <sub>n</sub> ew | visit <sub>n</sub> ew | lsmean | SE  | df  | lower.CL | upper.CL |
|---------------------------|-----------------------|--------|-----|-----|----------|----------|
| Surgery                   | 3 Month               | 47.2   | 4.7 | 123 | 37.8     | 57       |
| Surgery                   | 6 Month               | 12.9   | 4.9 | 123 | 3.2      | 23       |
| Surgery                   | 12 Month              | 4.0    | 4.9 | 123 | -5.7     | 14       |
| Surgery                   | 18 Month              | 4.9    | 5.2 | 123 | -5.4     | 15       |

### 2.8.9 LS Means for Non-operative Group in Final Model

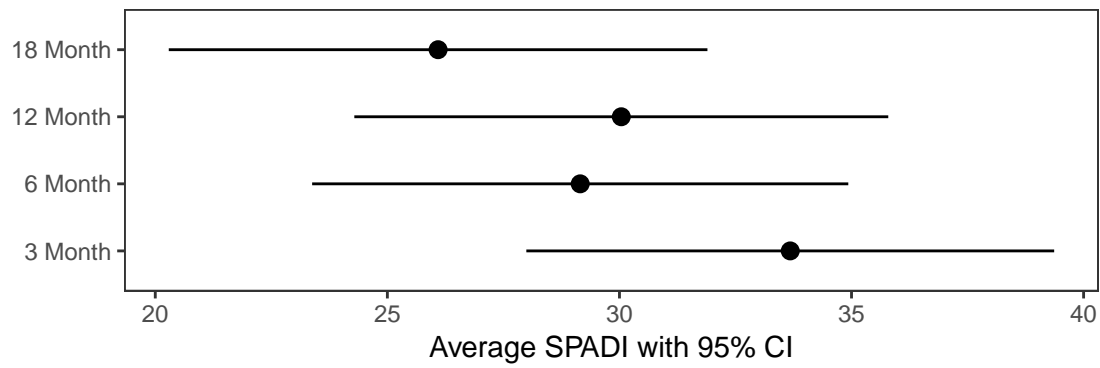

| operative <sub>n</sub> ew | visit <sub>n</sub> ew | lsmean | SE  | df  | lower.CL | upper.CL |
|---------------------------|-----------------------|--------|-----|-----|----------|----------|
| Non-operative             | 3 Month               | 34     | 2.9 | 122 | 28       | 39       |
| Non-operative             | 6 Month               | 29     | 2.9 | 122 | 23       | 35       |
| Non-operative             | 12 Month              | 30     | 2.9 | 122 | 24       | 36       |
| Non-operative             | 18 Month              | 26     | 2.9 | 122 | 20       | 32       |

## 2.9 Model with interaction - 18 month data removed

### 2.9.1 Model Fitting

| ## |                                              | lower est. | upper | p.value |       |
|----|----------------------------------------------|------------|-------|---------|-------|
| ## | (Intercept)                                  | 37         | 47    | 55.8    | 0.000 |
| ## | visit_new6 Month                             | -43        | -34   | -24.0   | 0.000 |
| ## | visit_new12 Month                            | -51        | -42   | -34.0   | 0.000 |
| ## | operative_newNon-operative                   | -24        | -13   | -2.6    | 0.017 |
| ## | visit_new6 Month:operative_newNon-operative  | 19         | 29    | 39.1    | 0.000 |
| ## | visit_new12 Month:operative_newNon-operative | 31         | 39    | 48.1    | 0.000 |

### 2.9.2 Residual Plot of Final Model

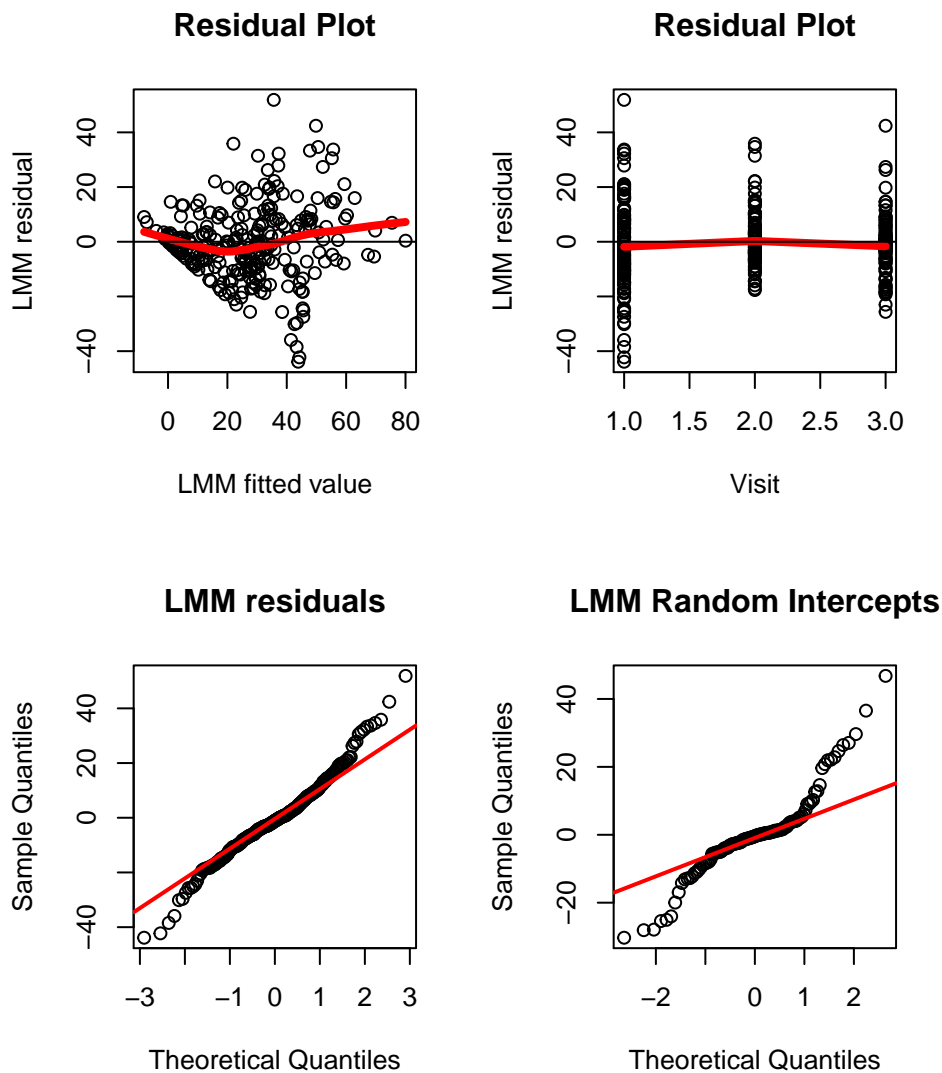

- Anderson-Darling normality test for LMM residuals is  $8.2 \times 10^{-5}$ .
- Anderson-Darling normality test for LMM random intercepts is  $8.41 \times 10^{-12}$ .



### 2.9.3 LS Means for Difference Between Operative and Non-operative Groups in Final Model

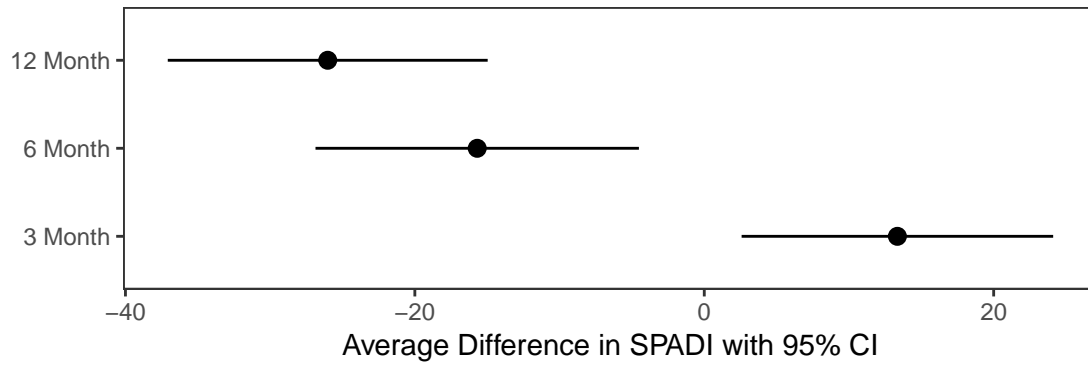

| contrast                | visit <sub>n</sub> ew | estimate | SE  | df  | t.ratio | p.value | upper | lower |
|-------------------------|-----------------------|----------|-----|-----|---------|---------|-------|-------|
| Surgery - Non-operative | 3 Month               | 13       | 5.5 | 119 | 2.4     | 0.01661 | 24.1  | 2.6   |
| Surgery - Non-operative | 6 Month               | -16      | 5.7 | 119 | -2.8    | 0.00685 | -4.5  | -26.9 |
| Surgery - Non-operative | 12 Month              | -26      | 5.6 | 119 | -4.6    | 0.00001 | -15.0 | -37.1 |

### 2.9.4 LS Means for Operative Group in Final Model

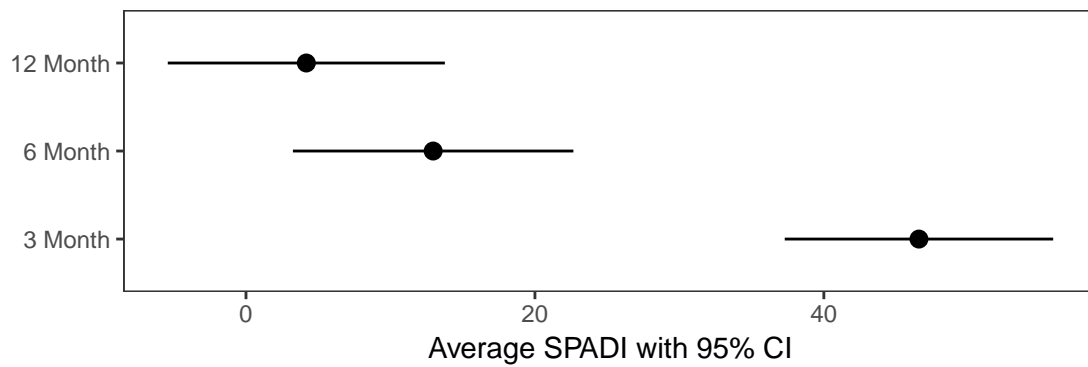

| operative <sub>n</sub> ew | visit <sub>n</sub> ew | lsmean | SE  | df  | lower.CL | upper.CL |
|---------------------------|-----------------------|--------|-----|-----|----------|----------|
| Surgery                   | 3 Month               | 46.6   | 4.7 | 120 | 37.3     | 56       |
| Surgery                   | 6 Month               | 13.0   | 4.9 | 120 | 3.2      | 23       |
| Surgery                   | 12 Month              | 4.2    | 4.8 | 120 | -5.4     | 14       |

### 2.9.5 LS Means for Non-operative Group in Final Model

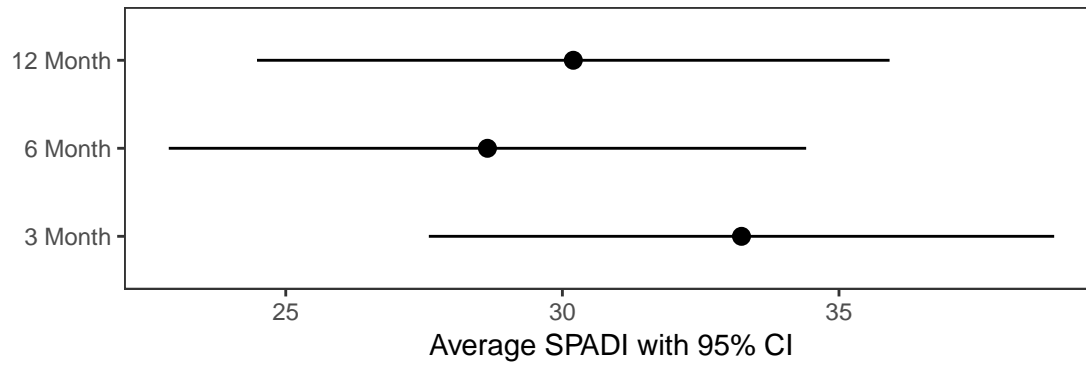

| <i>operative<sub>n</sub>ew</i> | <i>visit<sub>n</sub>ew</i> | lsmean | SE  | df  | lower.CL | upper.CL |
|--------------------------------|----------------------------|--------|-----|-----|----------|----------|
| Non-operative                  | 3 Month                    | 33     | 2.9 | 119 | 28       | 39       |
| Non-operative                  | 6 Month                    | 29     | 2.9 | 119 | 23       | 34       |
| Non-operative                  | 12 Month                   | 30     | 2.9 | 119 | 24       | 36       |

## 2.10 Model with square-root transformed outcome

### 2.10.1 Model Fitting

```
##                               lower est. upper p.value
## (Intercept)                   5.8  6.8  7.77  0.000
## visit_new6 Month              -4.7 -3.8 -2.87  0.000
## visit_new12 Month             -6.2 -5.3 -4.42  0.000
## visit_new18 Month             -6.4 -5.4 -4.46  0.000
## operative_newNon-operative    -2.7 -1.6 -0.45  0.007
## visit_new6 Month:operative_newNon-operative  2.4  3.3  4.23  0.000
## visit_new12 Month:operative_newNon-operative  4.1  5.0  5.90  0.000
## visit_new18 Month:operative_newNon-operative  3.6  4.6  5.56  0.000
```

### 2.10.2 Residual Plot of Final Model

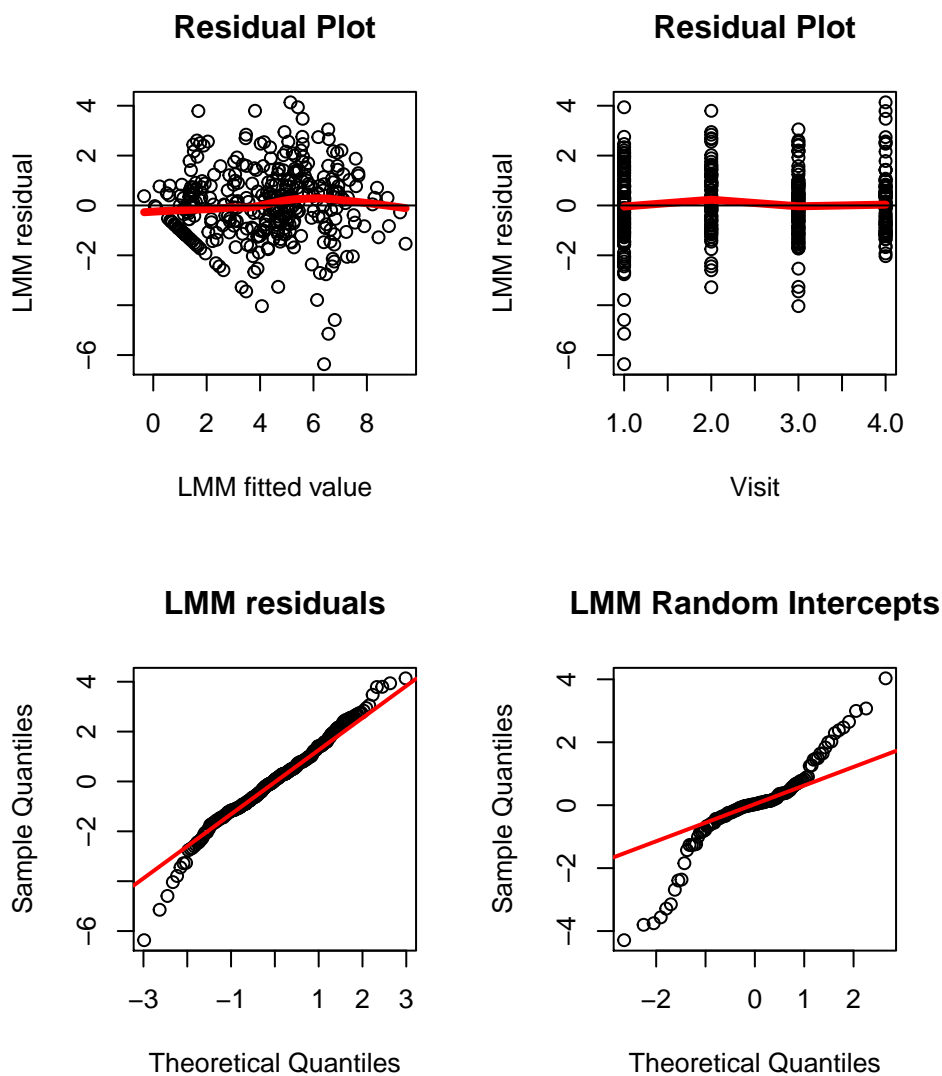

- Anderson-Darling normality test for LMM residuals is 0.01.
- Anderson-Darling normality test for LMM random intercepts is  $5.14 \times 10^{-12}$ .

2.10.3 LS Means for Difference Between Operative and Non-operative Groups in Final Model

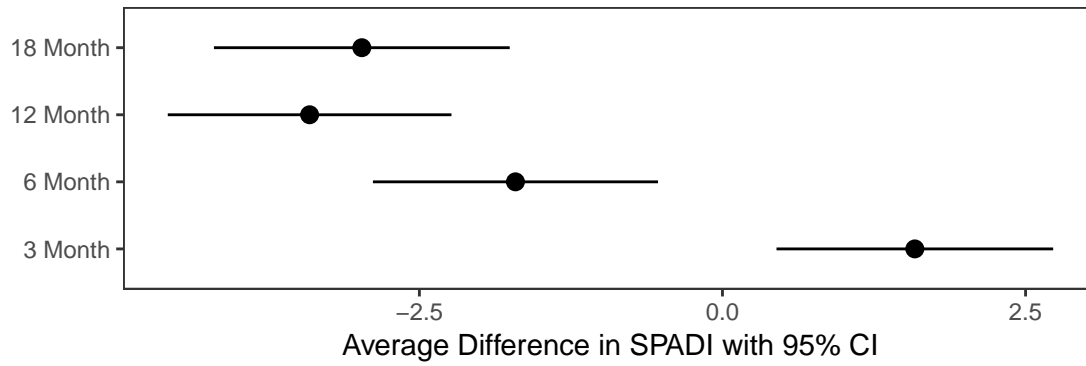

| contrast                | visit <sub>new</sub> | estimate | SE   | df  | t.ratio | p.value | upper | lower |
|-------------------------|----------------------|----------|------|-----|---------|---------|-------|-------|
| Surgery - Non-operative | 3 Month              | 1.6      | 0.58 | 122 | 2.7     | 7.4e-03 | 2.73  | 0.45  |
| Surgery - Non-operative | 6 Month              | -1.7     | 0.60 | 122 | -2.8    | 5.2e-03 | -0.53 | -2.88 |
| Surgery - Non-operative | 12 Month             | -3.4     | 0.60 | 122 | -5.7    | 8.3e-08 | -2.24 | -4.58 |
| Surgery - Non-operative | 18 Month             | -3.0     | 0.62 | 122 | -4.8    | 5.0e-06 | -1.75 | -4.19 |

2.10.4 LS Means for Operative Group in Final Model

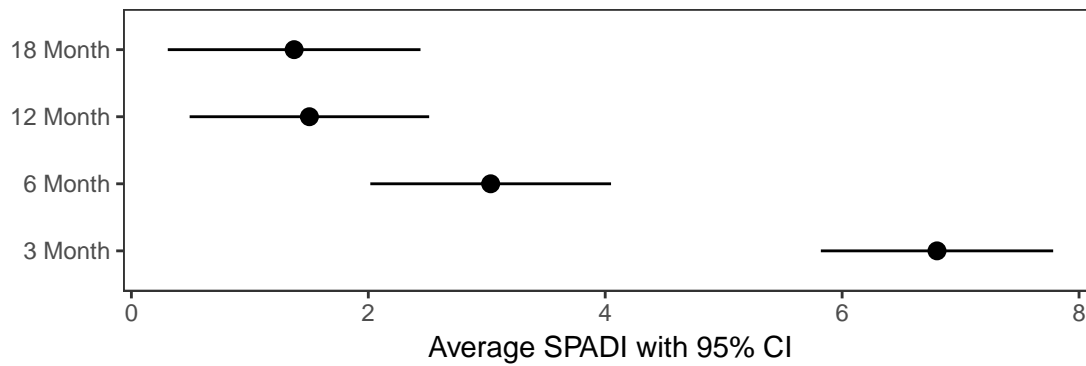

| operative <sub>new</sub> | visit <sub>new</sub> | lsmean | SE   | df  | lower.CL | upper.CL |
|--------------------------|----------------------|--------|------|-----|----------|----------|
| Surgery                  | 3 Month              | 6.8    | 0.50 | 123 | 5.82     | 7.8      |
| Surgery                  | 6 Month              | 3.0    | 0.51 | 123 | 2.02     | 4.0      |
| Surgery                  | 12 Month             | 1.5    | 0.51 | 123 | 0.49     | 2.5      |
| Surgery                  | 18 Month             | 1.4    | 0.54 | 123 | 0.31     | 2.4      |

### 2.10.5 LS Means for Non-operative Group in Final Model

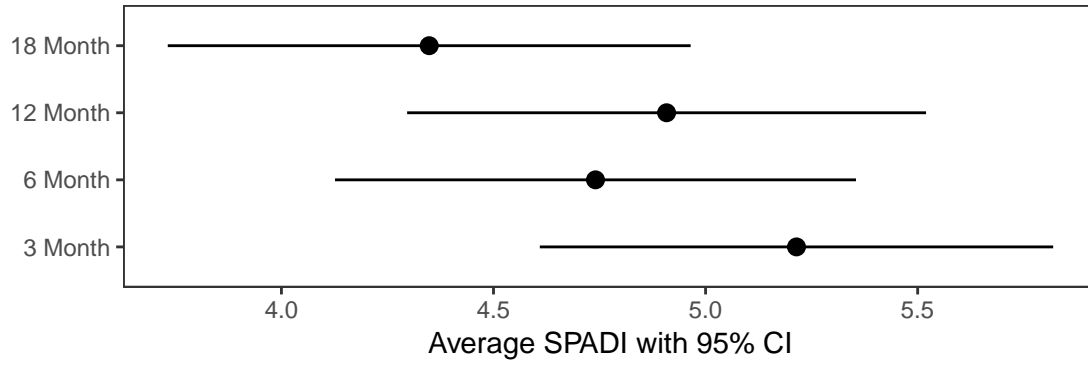

| <i>operative<sub>new</sub></i> | <i>visit<sub>new</sub></i> | lsmean | SE   | df  | lower.CL | upper.CL |
|--------------------------------|----------------------------|--------|------|-----|----------|----------|
| Non-operative                  | 3 Month                    | 5.2    | 0.31 | 122 | 4.6      | 5.8      |
| Non-operative                  | 6 Month                    | 4.7    | 0.31 | 122 | 4.1      | 5.4      |
| Non-operative                  | 12 Month                   | 4.9    | 0.31 | 122 | 4.3      | 5.5      |
| Non-operative                  | 18 Month                   | 4.3    | 0.31 | 122 | 3.7      | 5.0      |

## 2.11 Model with square-root transformed outcome - 18 month data removed

### 2.11.1 Model Fitting

| ## |                                              | lower est. | upper | p.value |       |
|----|----------------------------------------------|------------|-------|---------|-------|
| ## | (Intercept)                                  | 5.8        | 6.7   | 7.66    | 0.000 |
| ## | visit_new6 Month                             | -4.7       | -3.7  | -2.69   | 0.000 |
| ## | visit_new12 Month                            | -6.0       | -5.2  | -4.40   | 0.000 |
| ## | operative_newNon-operative                   | -2.6       | -1.5  | -0.43   | 0.008 |
| ## | visit_new6 Month:operative_newNon-operative  | 2.2        | 3.2   | 4.21    | 0.000 |
| ## | visit_new12 Month:operative_newNon-operative | 4.1        | 4.9   | 5.79    | 0.000 |

### 2.11.2 Residual Plot of Final Model

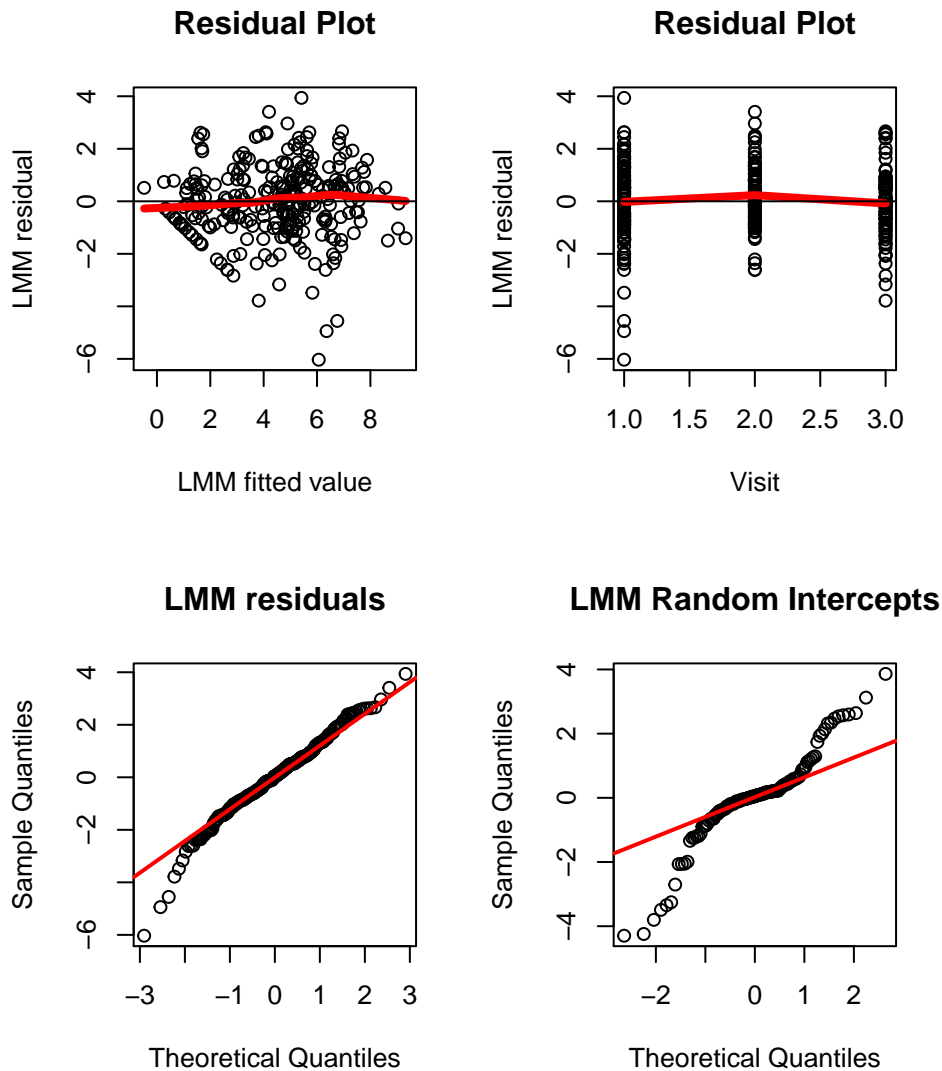

- Anderson-Darling normality test for LMM residuals is 0.03.
- Anderson-Darling normality test for LMM random intercepts is  $2.37 \times 10^{-11}$ .

### 2.11.3 LS Means for Difference Between Operative and Non-operative Groups in Final Model

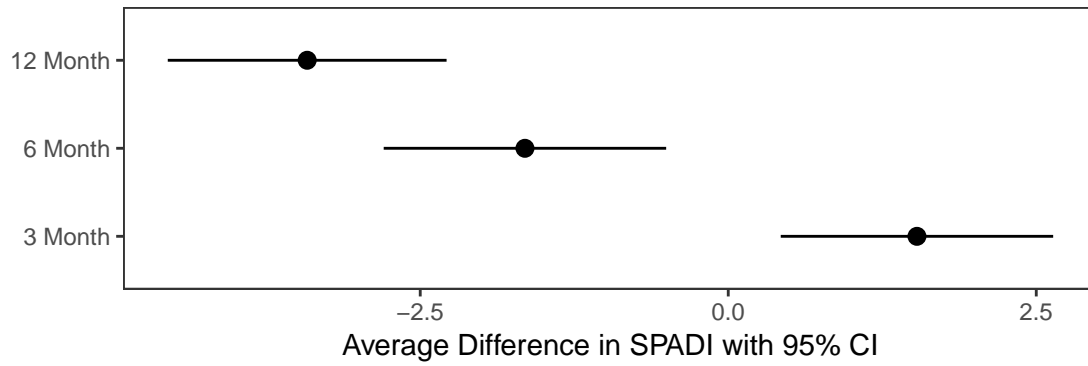

| contrast                | visit <sub>new</sub> | estimate | SE   | df  | t.ratio | p.value     | upper | lower |
|-------------------------|----------------------|----------|------|-----|---------|-------------|-------|-------|
| Surgery - Non-operative | 3 Month              | 1.5      | 0.56 | 119 | 2.7     | $7.6e - 03$ | 2.6   | 0.43  |
| Surgery - Non-operative | 6 Month              | -1.7     | 0.58 | 119 | -2.8    | $5.6e - 03$ | -0.5  | -2.80 |
| Surgery - Non-operative | 12 Month             | -3.4     | 0.58 | 119 | -5.9    | $3.2e - 08$ | -2.3  | -4.55 |

### 2.11.4 LS Means for Operative Group in Final Model

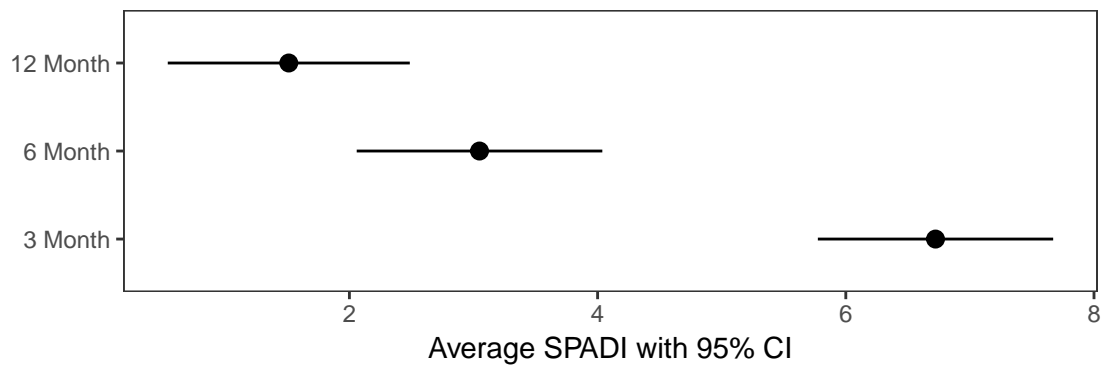

| operative <sub>new</sub> | visit <sub>new</sub> | lsmean | SE   | df  | lower.CL | upper.CL |
|--------------------------|----------------------|--------|------|-----|----------|----------|
| Surgery                  | 3 Month              | 6.7    | 0.48 | 120 | 5.77     | 7.7      |
| Surgery                  | 6 Month              | 3.0    | 0.50 | 120 | 2.06     | 4.0      |
| Surgery                  | 12 Month             | 1.5    | 0.49 | 120 | 0.54     | 2.5      |

### 2.11.5 LS Means for Non-operative Group in Final Model

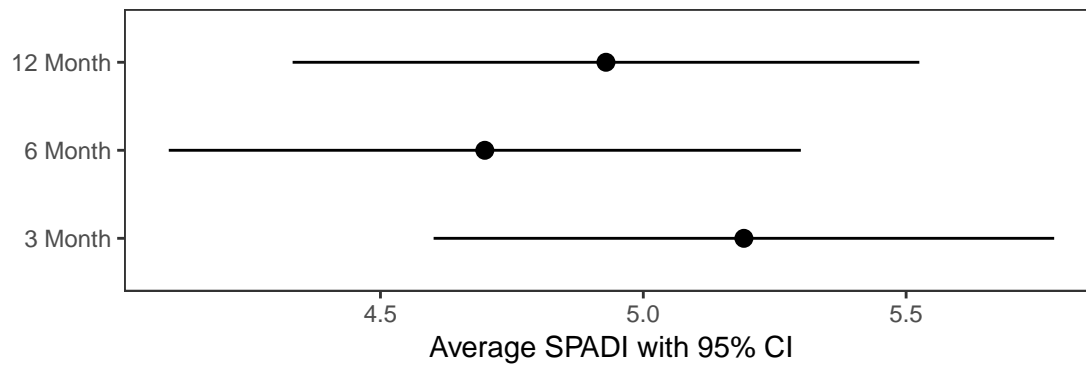

| <i>operative<sub>n</sub>ew</i> | <i>visit<sub>n</sub>ew</i> | lsmean | SE  | df  | lower.CL | upper.CL |
|--------------------------------|----------------------------|--------|-----|-----|----------|----------|
| Non-operative                  | 3 Month                    | 5.2    | 0.3 | 119 | 4.6      | 5.8      |
| Non-operative                  | 6 Month                    | 4.7    | 0.3 | 119 | 4.1      | 5.3      |
| Non-operative                  | 12 Month                   | 4.9    | 0.3 | 119 | 4.3      | 5.5      |



## 2.12 List of Patients in Final Model

| baseline | 3 month | 6 month | 12 month | 18 month |
|----------|---------|---------|----------|----------|
| 1-1-008  | 1-1-008 | 1-1-008 | 1-1-008  | 1-1-008  |
| 1-1-017  | 1-1-017 | 1-1-017 |          |          |
| 1-1-020  |         |         | 1-1-020  |          |
| 1-1-033  | 1-1-033 | 1-1-033 | 1-1-033  | 1-1-033  |
| 1-1-037  | 1-1-037 | 1-1-037 | 1-1-037  | 1-1-037  |
| 1-1-038  | 1-1-038 | 1-1-038 |          | 1-1-038  |
| 1-1-040  | 1-1-040 | 1-1-040 | 1-1-040  | 1-1-040  |
| 1-1-044  | 1-1-044 | 1-1-044 | 1-1-044  | 1-1-044  |
| 1-1-047  | 1-1-047 |         | 1-1-047  |          |
| 1-1-055  | 1-1-055 | 1-1-055 | 1-1-055  | 1-1-055  |
| 1-1-058  | 1-1-058 |         | 1-1-058  | 1-1-058  |
| 1-1-059  | 1-1-059 |         |          |          |
| 1-1-062  | 1-1-062 | 1-1-062 | 1-1-062  | 1-1-062  |
| 1-1-063  | 1-1-063 |         | 1-1-063  | 1-1-063  |
| 1-1-064  |         |         |          |          |
| 1-1-067  | 1-1-067 | 1-1-067 |          |          |
| 1-1-071  | 1-1-071 | 1-1-071 | 1-1-071  | 1-1-071  |
| 1-1-076  |         |         | 1-1-076  | 1-1-076  |
| 1-1-081  | 1-1-081 | 1-1-081 | 1-1-081  | 1-1-081  |
| 1-1-096  | 1-1-096 | 1-1-096 | 1-1-096  | 1-1-096  |
| 1-1-099  | 1-1-099 | 1-1-099 |          |          |
| 1-1-114  | 1-1-114 | 1-1-114 | 1-1-114  | 1-1-114  |
| 1-1-115  | 1-1-115 |         | 1-1-115  | 1-1-115  |
| 1-1-127  |         |         | 1-1-127  |          |
| 1-1-140  | 1-1-140 | 1-1-140 | 1-1-140  | 1-1-140  |
| 1-1-141  | 1-1-141 | 1-1-141 | 1-1-141  | 1-1-141  |
| 1-1-142  | 1-1-142 | 1-1-142 | 1-1-142  | 1-1-142  |
| 1-1-150  | 1-1-150 | 1-1-150 |          | 1-1-150  |
| 1-1-154  |         |         | 1-1-154  | 1-1-154  |
| 1-1-167  | 1-1-167 | 1-1-167 | 1-1-167  | 1-1-167  |
| 1-1-169  | 1-1-169 | 1-1-169 | 1-1-169  | 1-1-169  |
| 1-1-170  | 1-1-170 | 1-1-170 | 1-1-170  | 1-1-170  |
| 1-1-172  | 1-1-172 | 1-1-172 |          |          |
| 1-1-178  | 1-1-178 |         |          |          |
| 1-1-182  | 1-1-182 | 1-1-182 | 1-1-182  | 1-1-182  |
| 1-1-191  | 1-1-191 |         |          |          |
| 1-1-193  |         |         | 1-1-193  |          |
| 1-1-194  | 1-1-194 | 1-1-194 | 1-1-194  | 1-1-194  |
| 1-1-195  | 1-1-195 | 1-1-195 | 1-1-195  | 1-1-195  |
| 1-1-204  | 1-1-204 | 1-1-204 | 1-1-204  | 1-1-204  |
| 1-1-207  | 1-1-207 | 1-1-207 | 1-1-207  | 1-1-207  |
| 1-1-209  | 1-1-209 | 1-1-209 | 1-1-209  | 1-1-209  |
| 1-1-212  | 1-1-212 | 1-1-212 | 1-1-212  | 1-1-212  |
| 1-1-216  | 1-1-216 | 1-1-216 | 1-1-216  | 1-1-216  |
| 1-1-220  | 1-1-220 | 1-1-220 | 1-1-220  | 1-1-220  |
| 1-1-225  | 1-1-225 | 1-1-225 | 1-1-225  | 1-1-225  |
| 1-1-230  | 1-1-230 | 1-1-230 | 1-1-230  | 1-1-230  |
| 1-1-234  | 1-1-234 |         |          |          |
| 1-1-236  | 1-1-236 |         |          |          |

| baseline  | 3 month   | 6 month   | 12 month | 18 month |
|-----------|-----------|-----------|----------|----------|
| 1-1-237   | 1-1-237   | 1-1-237   | 1-1-237  | 1-1-237  |
| 1-1-242   |           | 1-1-242   |          |          |
| 1-1-244   | 1-1-244   |           |          |          |
| 1-1-247   | 1-1-247   | 1-1-247   | 1-1-247  | 1-1-247  |
| 1-1-248   | 1-1-248   | 1-1-248   | 1-1-248  | 1-1-248  |
| 1-1-249   | 1-1-249   |           |          |          |
| 1-1-253   | 1-1-253   | 1-1-253   |          | 1-1-253  |
| 1-1-255   | 1-1-255   | 1-1-255   | 1-1-255  |          |
| 1-1-256   | 1-1-256   | 1-1-256   | 1-1-256  | 1-1-256  |
| 1-1-259   | 1-1-259   | 1-1-259   | 1-1-259  | 1-1-259  |
| 1-1-261   | 1-1-261   | 1-1-261   | 1-1-261  |          |
| 1-1-263   | 1-1-263   | 1-1-263   |          |          |
| 1-1-267   | 1-1-267   | 1-1-267   | 1-1-267  |          |
| 1-1-271   | 1-1-271   | 1-1-271   | 1-1-271  |          |
| 1-1-278   | 1-1-278   | 1-1-278   | 1-1-278  |          |
| 1-1-279   | 1-1-279   | 1-1-279   |          |          |
| 1-2-001   |           | 1-2-001   | 1-2-001  | 1-2-001  |
| 1-2-002   | 1-2-002   | 1-2-002   | 1-2-002  | 1-2-002  |
| 1-2-003   | 1-2-003   | 1-2-003   | 1-2-003  | 1-2-003  |
| 1-2-004   | 1-2-004   | 1-2-004   | 1-2-004  | 1-2-004  |
| 1-2-007   | 1-2-007   | 1-2-007   | 1-2-007  | 1-2-007  |
| 1-2-009   | 1-2-009   | 1-2-009   | 1-2-009  | 1-2-009  |
| 1-2-014   | 1-2-014   | 1-2-014   | 1-2-014  | 1-2-014  |
| 1-2-015   | 1-2-015   | 1-2-015   | 1-2-015  | 1-2-015  |
| 1-2-016   | 1-2-016   | 1-2-016   | 1-2-016  | 1-2-016  |
| 1-2-017   |           | 1-2-017   | 1-2-017  | 1-2-017  |
| 1-2-018   |           | 1-2-018   | 1-2-018  | 1-2-018  |
| 1-2-019   | 1-2-019   | 1-2-019   | 1-2-019  | 1-2-019  |
| 1-2-020   | 1-2-020   | 1-2-020   | 1-2-020  | 1-2-020  |
| 1-2-021   | 1-2-021   | 1-2-021   | 1-2-021  | 1-2-021  |
| 1-2-023   | 1-2-023   | 1-2-023   | 1-2-023  | 1-2-023  |
| 1-2-024   | 1-2-024   | 1-2-024   | 1-2-024  | 1-2-024  |
| 1-2-025   | 1-2-025   | 1-2-025   |          |          |
| 1-2-027   |           |           |          |          |
| 1-3-004   |           |           |          |          |
| 1-3-008   | 1-3-008   |           |          |          |
| 1-3-012   | 1-3-012   |           |          |          |
|           |           | 1-2-027   | 1-2-027  |          |
|           |           |           | 1-3-004  | 1-3-004  |
|           |           |           |          | 1-3-008  |
| 1-3-020   | 1-3-020   | 1-3-020   | 1-3-020  | 1-3-020  |
| 1-3-031   | 1-3-031   | 1-3-031   | 1-3-031  | 1-3-031  |
| 1-3-035   | 1-3-035   | 1-3-035   | 1-3-035  | 1-3-035  |
| 1-3-041   | 1-3-041   | 1-3-041   | 1-3-041  | 1-3-041  |
| 1-3-046   | 1-3-046   | 1-3-046   | 1-3-046  |          |
| 1-3-047   | 1-3-047   | 1-3-047   | 1-3-047  | 1-3-047  |
| 14172-101 | 14172-101 |           |          |          |
| 14172-102 | 14172-102 | 14172-102 |          |          |
| 14172-103 | 14172-103 |           |          |          |
| 14172-104 | 14172-104 |           |          |          |
| 14172-105 | 14172-105 |           |          |          |

| baseline     | 3 month      | 6 month     | 12 month    | 18 month    |
|--------------|--------------|-------------|-------------|-------------|
| 14172-107    | 14172-107    |             |             |             |
| 14173-402    | 14173-402    |             |             |             |
| 2-1-002      | 2-1-002      | 2-1-002     | 2-1-002     | 2-1-002     |
| 2-1-014      |              |             |             | 2-1-014     |
| 2-1-023      | 2-1-023      | 2-1-023     | 2-1-023     | 2-1-023     |
| 2-1-030      |              |             | 2-1-030     | 2-1-030     |
| 2-1-037      | 2-1-037      |             |             |             |
| 2-1-040      | 2-1-040      | 2-1-040     | 2-1-040     | 2-1-040     |
| 2-1-043      | 2-1-043      |             | 2-1-043     |             |
| 2-1-046      | 2-1-046      | 2-1-046     | 2-1-046     | 2-1-046     |
| 2-1-047      | 2-1-047      | 2-1-047     | 2-1-047     | 2-1-047     |
| 2-1-063      | 2-1-063      | 2-1-063     | 2-1-063     |             |
| 2-1-070      |              | 2-1-070     |             |             |
| 2-1-071      | 2-1-071      | 2-1-071     | 2-1-071     |             |
| EX-1-1-012   | EX-1-1-012   | EX-1-1-012  | EX-1-1-012  |             |
| EX-1-1-014   | EX-1-1-014   | EX-1-1-014  | EX-1-1-014  | EX-1-1-014  |
| EX-1-1-043   | EX-1-1-043   | EX-1-1-043  | EX-1-1-043  | EX-1-1-043  |
| EX-1-1-080   | EX-1-1-080   | EX-1-1-080  | EX-1-1-080  | EX-1-1-080  |
| EX-1-1-085   | EX-1-1-085   | EX-1-1-085  | EX-1-1-085  | EX-1-1-085  |
| EX-1-1-090   | EX-1-1-090   |             | EX-1-1-090  | EX-1-1-090  |
| EX-1-1-092   | EX-1-1-092   | EX-1-1-092  | EX-1-1-092  | EX-1-1-092  |
| EX-1-1-095   |              | EX-1-1-095  | EX-1-1-095  | EX-1-1-095  |
| EX-1-1-128   | EX-1-1-128   |             |             |             |
| EX-1-1-156   | EX-1-1-156   | EX-1-1-156  | EX-1-1-156  | EX-1-1-156  |
| EX-1-1-187   | EX-1-1-187   | EX-1-1-187  | EX-1-1-187  | EX-1-1-187  |
| EX-1-1-232   |              | EX-1-1-232  | EX-1-1-232  |             |
| EX-1-1-277   | EX-1-1-277   |             |             |             |
| EX-1-2-005   | EX-1-2-005   | EX-1-2-005  | EX-1-2-005  | EX-1-2-005  |
| EX-1-2-008   |              |             | EX-1-2-008  | EX-1-2-008  |
| EX-1-2-022   | EX-1-2-022   | EX-1-2-022  |             |             |
|              |              |             |             |             |
| <b>n=127</b> | <b>n=109</b> | <b>n=93</b> | <b>n=93</b> | <b>n=82</b> |

- Patients missing SPADI information were highlighted.
- There are 126 unique patients for 3 month, 6 month, 12 month, and 18 month visits.
- The total number of patients in final model is 124, patients 1-1-059 and 1-1-067 don't have SPADI information at any follow-up visits.

---

## 3 Linear Mixed Effect Model with Selected Variables

### 3.1 Selected Variables in Full Model

- Do you smoke
- Age
- Do you drink alcohol?
- Baseline SPADI
- External rotatio ratio
- Daily shoulder use at work
- Trauma
- Fatty infiltration
- Number of torn
- MHI-5
- Patient expectation
- Full tear of any tendons?

### 3.2 Redundancy Analysis for Selected Variables at Baseline

```
##
## Redundancy Analysis
##
## redun(formula = ~basespadi + pi_age + hx_f6_f + hx_e9_f + external.rotation.ratio +
##   fat_f + mhi + as.factor(torn_f) + hx_e8a_f + trauma_f + full_f +
##   hx_h1_f, data = dat1, r2 = 0.9, type = "adjusted", nk = 4)
##
## n: 81  p: 12  nk: 4
##
## Number of NAs: 46
## Frequencies of Missing Values Due to Each Variable
##           basespadi           pi_age           hx_f6_f
##           7           0           1
##           hx_e9_f external.rotation.ratio           fat_f
##           3           8           28
##           mhi       as.factor(torn_f)           hx_e8a_f
##           2           17           3
##           trauma_f           full_f           hx_h1_f
##           6           17           2
##
##
## Transformation of target variables forced to be linear
##
## R-squared cutoff: 0.9  Type: adjusted
##
## R^2 with which each variable can be predicted from all other variables:
##
##           basespadi           pi_age           hx_f6_f
##           0.135           0.197           0.052
##           hx_e9_f external.rotation.ratio           fat_f
##           0.085           0.048           0.427
##           mhi       as.factor(torn_f)           hx_e8a_f
##           0.134           0.210           0.042
##           trauma_f           full_f           hx_h1_f
##           0.055           0.106           0.000
##
## No redundant variables
```

- The predictor that can be predicted from the remaining set with the adjusted  $R^2$  higher than 0.9 is removed.
- There is no redundant variable.

### 3.3 Cluster Analysis for Selected Variables at Baseline

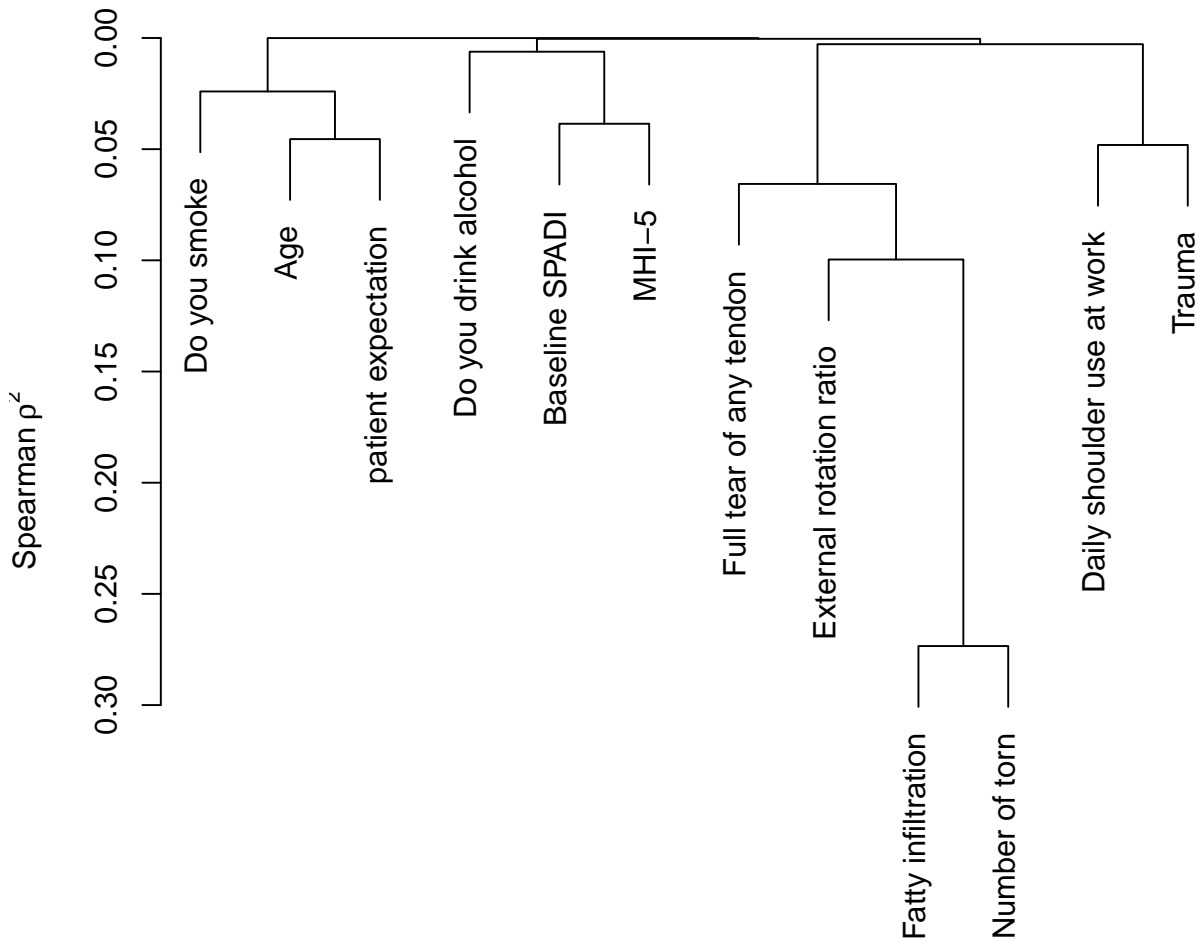

### 3.4 Model Fitting

| ##                                              | lower  | est.    | upper  | p.value |
|-------------------------------------------------|--------|---------|--------|---------|
| ## (Intercept)                                  | -0.84  | 30.290  | 61.42  | 0.068   |
| ## visit_new6 Month                             | -11.35 | -5.205  | 0.94   | 0.112   |
| ## visit_new12 Month                            | -11.56 | -4.960  | 1.64   | 0.158   |
| ## visit_new18 Month                            | -18.71 | -12.365 | -6.02  | 0.000   |
| ## operative_newNon-operative                   | -10.40 | 0.296   | 10.99  | 0.958   |
| ## basespadi                                    | 0.15   | 0.312   | 0.47   | 0.000   |
| ## pi_age                                       | -0.56  | -0.159  | 0.24   | 0.451   |
| ## hx_f6_fHeavy/Moderate manual labor           | -2.68  | 4.837   | 12.36  | 0.224   |
| ## hx_e9_f1-2 times per week or more            | -16.30 | -9.357  | -2.41  | 0.012   |
| ## external.rotation.ratio                      | -2.88  | 5.309   | 13.50  | 0.220   |
| ## fat_fYes                                     | 7.55   | 15.081  | 22.61  | 0.000   |
| ## mhi                                          | -0.23  | 0.004   | 0.24   | 0.974   |
| ## torn_f2 or 3                                 | -8.73  | -1.095  | 6.55   | 0.785   |
| ## hx_e8a_fPast/current                         | -7.33  | -0.907  | 5.51   | 0.788   |
| ## trauma_fYes                                  | -8.64  | -2.358  | 3.93   | 0.476   |
| ## hx_h1_fOther                                 | -11.54 | -2.639  | 6.26   | 0.573   |
| ## full_fYes                                    | -11.36 | -3.318  | 4.72   | 0.433   |
| ## visit_new6 Month:operative_newNon-operative  | -24.30 | -15.781 | -7.26  | 0.001   |
| ## visit_new12 Month:operative_newNon-operative | -33.69 | -24.547 | -15.40 | 0.000   |
| ## visit_new18 Month:operative_newNon-operative | -26.05 | -17.334 | -8.62  | 0.000   |

- The AIC for model with compound symmetric correlation structure is 1858.
- The AIC for model with auto-regressive correlation structure is 1859.37.
- Model with general compound symmetric correlation structure is the final model.
- Number of Observations: 232
- Number of Groups: 79

### 3.5 Residual Plot of Final Model

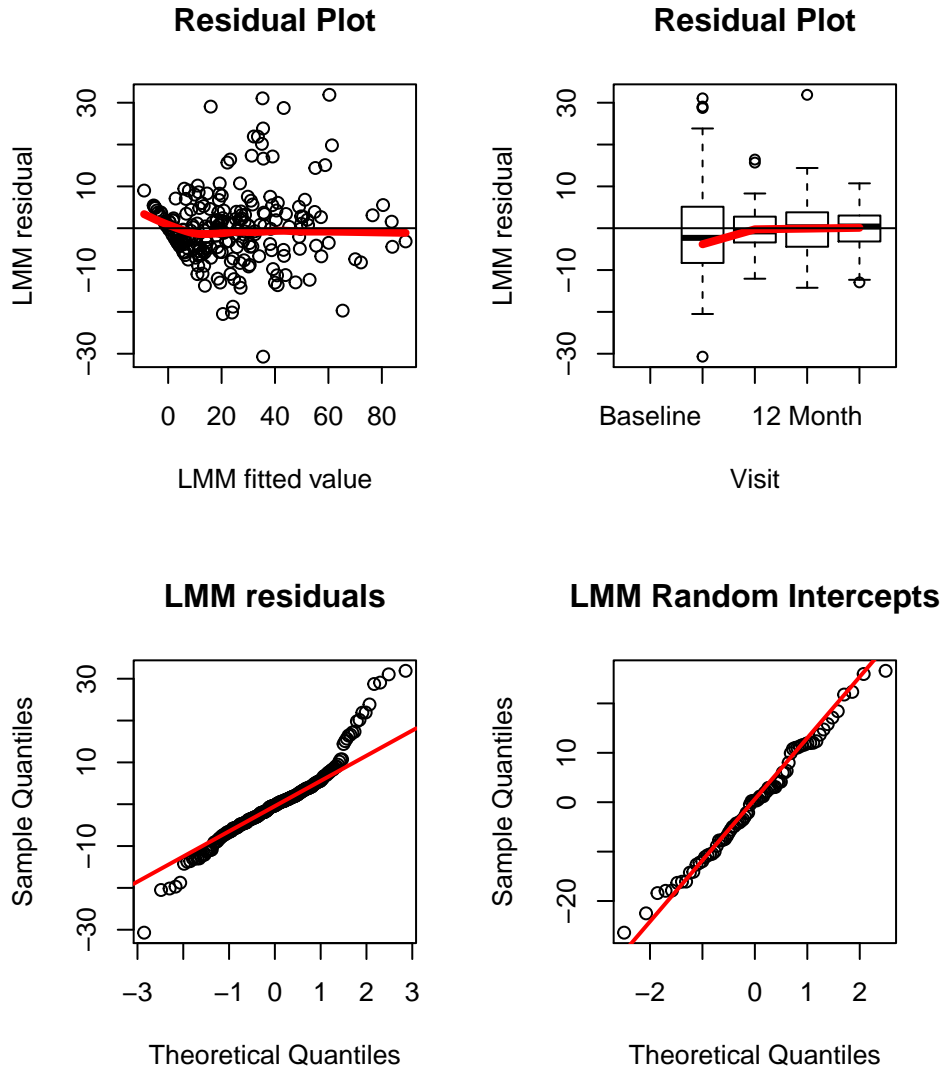

- Anderson-Darling normality test for LMM residuals is  $2.25 \times 10^{-10}$ .
- Anderson-Darling normality test for LMM random intercepts is 0.78.



## 4 Comparison of SPADI30 by Treatment

- If SPADI30 of any follow-up visit is 1, SPADI30\_comb is 1.
- If SPADI30 of all follow-up visits are 0, SPADI30\_comb is 0.
- If SPADI30 is missing for all follow-up visits, SPADI30\_comb is missing.

.  $N$  is the number of non-missing values. Numbers after proportions are frequencies.

|              | N   | Surgery   | Non-operative | Combined  |
|--------------|-----|-----------|---------------|-----------|
|              |     | $N = 50$  | $N = 77$      | $N = 127$ |
| spadi30_comb | 127 |           |               |           |
| 0            |     | 0.10 ( 5) | 0.34 (26)     | 0.24 (31) |
| 1            |     | 0.90 (45) | 0.57 (44)     | 0.70 (89) |
| NA           |     | 0.00 ( 0) | 0.09 ( 7)     | 0.06 ( 7) |

```
##           Surgery Non-operative
## SPADI_30_comb=0      5          26
## SPADI_30_comb=1     45          44
##
## Pearson's Chi-squared test with Yates' continuity correction
##
## data:  m
## X-squared = 10, df = 1, p-value = 0.002
```

## 5 Comparison of SPADI50 by Treatment

- If SPADI50 of any follow-up visit is 1, SPADI50\_comb is 1.
- If SPADI50 of all follow-up visits are 0, SPADI50\_comb is 0.
- If SPADI50 is missing for all follow-up visits, SPADI50\_comb is missing.

.  $N$  is the number of non-missing values. Numbers after proportions are frequencies.

|              | N   | Surgery   | Non-operative | Combined  |
|--------------|-----|-----------|---------------|-----------|
|              |     | $N = 50$  | $N = 77$      | $N = 127$ |
| spadi50_comb | 127 |           |               |           |
| 0            |     | 0.14 ( 7) | 0.47 (36)     | 0.34 (43) |
| 1            |     | 0.86 (43) | 0.44 (34)     | 0.61 (77) |
| NA           |     | 0.00 ( 0) | 0.09 ( 7)     | 0.06 ( 7) |

```
##           Surgery Non-operative
## SPADI_50_comb=0      7          36
## SPADI_50_comb=1     43          34
##
## Pearson's Chi-squared test with Yates' continuity correction
##
## data:  m
## X-squared = 20, df = 1, p-value = 6e-05
```
