# Supplementary material
Source: PubMed Central journal article supplement (PMC7325686)
Supplement: NIHMS1588154-supplement-Propensity_Score_ASES.pdf [file NIHMS1588154-supplement-Propensity_Score_ASES.pdf]

# Propensity Score Analysis with ASES as Outcome

Run Fan and Dan Ayers

July 30, 2018

## Contents

|           |                                                                                             |           |
|-----------|---------------------------------------------------------------------------------------------|-----------|
| <b>1</b>  | <b>Patient population</b>                                                                   | <b>2</b>  |
| <b>2</b>  | <b>Summary Table</b>                                                                        | <b>2</b>  |
| <b>3</b>  | <b>ASES and ASES Change by Visit</b>                                                        | <b>4</b>  |
| <b>4</b>  | <b>ASES Change Over Time by Treatment Groups (with 95% confidence interval)</b>             | <b>5</b>  |
| <b>5</b>  | <b>Multiple Imputation for Baseline Values</b>                                              | <b>5</b>  |
| <b>6</b>  | <b>Model Probability of Treatment (Propensity Score)</b>                                    | <b>6</b>  |
| 6.1       | Calculation of Propensity Score . . . . .                                                   | 6         |
| 6.2       | Calculation of Matching Weights . . . . .                                                   | 6         |
| 6.3       | Plots of Estimated Propensity Score and Matching Weights by Treatment . . . . .             | 6         |
| 6.4       | Summary Table after Weighting . . . . .                                                     | 6         |
| <b>7</b>  | <b>Linear Mixed Effect Model with Weighted Propensity Score</b>                             | <b>8</b>  |
| 7.1       | Identify the Best Model of ASES Over Time . . . . .                                         | 8         |
| 7.2       | Model Fit with Treatment and Weight . . . . .                                               | 9         |
| 7.2.1     | No interaction model . . . . .                                                              | 9         |
| 7.2.2     | Model with interaction . . . . .                                                            | 9         |
| 7.2.3     | Model comparison . . . . .                                                                  | 9         |
| 7.3       | Residual Plot of Final Model . . . . .                                                      | 10        |
| 7.4       | LS Means for Difference Between Operative and Non-operative Groups in Final Model . . . . . | 11        |
| 7.5       | LS Means for Operative Group in Final Model . . . . .                                       | 11        |
| 7.6       | LS Means for Non-operative Group in Final Model . . . . .                                   | 12        |
| <b>8</b>  | <b>Linear Mixed Effect Model with Selected Variables</b>                                    | <b>13</b> |
| 8.1       | Selected Variables in Full Model . . . . .                                                  | 13        |
| 8.2       | Redundancy Analysis for Selected Variables at Baseline . . . . .                            | 14        |
| 8.3       | Cluster Analysis for Selected Variables at Baseline . . . . .                               | 15        |
| 8.4       | Model Fitting . . . . .                                                                     | 16        |
| 8.5       | Residual Plot of Final Model . . . . .                                                      | 17        |
| <b>9</b>  | <b>Comparison of ASES30 by Treatment</b>                                                    | <b>18</b> |
| <b>10</b> | <b>Comparison of ASES50 by Treatment</b>                                                    | <b>18</b> |

# 1 Patient population

- The total sample size in clean dataset is 469.
- Exclude 79 patients that didn't return their baseline questionnaires (total sample size=390).
- Exclude 4 patients without degree of certainty information (total sample size=386).
- Exclude 228 baseline-only patients (total sample size=158).
- Among 158 patients, 138 of them are RCT+ (DOC+/MRI+ or DOC+/MRI missing). 5 patients are RCT- (DOC-). 15 patients are RCT missing (DOC+/MRI-).
- Among 138 RCT+ patients, 77 of them are non-operative (group2: non-operative and group6: delayed surgery without surgery date). 50 of them are operative group. The sample size is 127.

# 2 Summary Table

.  $a$   $b$   $c$  represent the lower quartile  $a$ , the median  $b$ , and the upper quartile  $c$  for continuous variables.  $x \pm s$  represents  $\bar{X} \pm 1$  SD.  $N$  is the number of non-missing values. Numbers after proportions are frequencies.

|                             | N   | Surgery<br>$N = 50$ |      |      | Non-operative<br>$N = 77$ |      |      | Combined<br>$N = 127$ |                   |      |      |      |                   |
|-----------------------------|-----|---------------------|------|------|---------------------------|------|------|-----------------------|-------------------|------|------|------|-------------------|
| Age                         | 127 | 51.6                | 59.1 | 64.6 | (59.3 $\pm$ 8.9)          | 59.3 | 64.6 | 68.6                  | (63.8 $\pm$ 8.3)  | 54.8 | 63.0 | 67.9 | (62.0 $\pm$ 8.8)  |
| Biceps tendonitis           | 127 |                     |      |      |                           |      |      |                       |                   |      |      |      |                   |
| No                          |     |                     |      | 0.7  | (35)                      |      |      | 0.7                   | (54)              |      |      | 0.7  | (89)              |
| Yes                         |     |                     |      | 0.3  | (15)                      |      |      | 0.3                   | (23)              |      |      | 0.3  | (38)              |
| Boileau                     | 127 |                     |      |      |                           |      |      |                       |                   |      |      |      |                   |
| 0/1                         |     |                     |      | 0.58 | (29)                      |      |      | 0.64                  | (49)              |      |      | 0.61 | (78)              |
| 2                           |     |                     |      | 0.38 | (19)                      |      |      | 0.17                  | (13)              |      |      | 0.25 | (32)              |
| NA                          |     |                     |      | 0.04 | (2)                       |      |      | 0.19                  | (15)              |      |      | 0.13 | (17)              |
| Daily shoulder use at work  | 127 |                     |      |      |                           |      |      |                       |                   |      |      |      |                   |
| Light/No manual labor       |     |                     |      | 0.74 | (37)                      |      |      | 0.82                  | (63)              |      |      | 0.79 | (100)             |
| Heavy/Moderate manual labor |     |                     |      | 0.24 | (12)                      |      |      | 0.18                  | (14)              |      |      | 0.20 | (26)              |
| NA                          |     |                     |      | 0.02 | (1)                       |      |      | 0.00                  | (0)               |      |      | 0.01 | (1)               |
| Do you drink alcohol?       | 127 |                     |      |      |                           |      |      |                       |                   |      |      |      |                   |
| 2-3 times per month or less |     |                     |      | 0.36 | (18)                      |      |      | 0.56                  | (43)              |      |      | 0.48 | (61)              |
| 1-2 times per week or more  |     |                     |      | 0.60 | (30)                      |      |      | 0.43                  | (33)              |      |      | 0.50 | (63)              |
| NA                          |     |                     |      | 0.04 | (2)                       |      |      | 0.01                  | (1)               |      |      | 0.02 | (3)               |
| Education                   | 127 |                     |      |      |                           |      |      |                       |                   |      |      |      |                   |
| Less than college           |     |                     |      | 0.32 | (16)                      |      |      | 0.34                  | (26)              |      |      | 0.33 | (42)              |
| College or above            |     |                     |      | 0.64 | (32)                      |      |      | 0.65                  | (50)              |      |      | 0.65 | (82)              |
| NA                          |     |                     |      | 0.04 | (2)                       |      |      | 0.01                  | (1)               |      |      | 0.02 | (3)               |
| External Rotation Ratio     | 119 | 0.31                | 0.51 | 0.71 | (0.54 $\pm$ 0.29)         | 0.59 | 0.76 | 0.98                  | (0.83 $\pm$ 0.45) | 0.49 | 0.68 | 0.91 | (0.72 $\pm$ 0.42) |
| FABQ                        | 122 | 17.0                | 19.0 | 22.8 | (19.0 $\pm$ 4.3)          | 12.0 | 18.0 | 21.0                  | (16.4 $\pm$ 6.1)  | 15.0 | 18.5 | 21.0 | (17.5 $\pm$ 5.6)  |
| Fatty infiltration          | 127 |                     |      |      |                           |      |      |                       |                   |      |      |      |                   |
| No                          |     |                     |      | 0.46 | (23)                      |      |      | 0.53                  | (41)              |      |      | 0.50 | (64)              |
| Yes                         |     |                     |      | 0.38 | (19)                      |      |      | 0.21                  | (16)              |      |      | 0.28 | (35)              |
| NA                          |     |                     |      | 0.16 | (8)                       |      |      | 0.26                  | (20)              |      |      | 0.22 | (28)              |
| Gender                      | 127 |                     |      |      |                           |      |      |                       |                   |      |      |      |                   |
| Female                      |     |                     |      | 0.38 | (19)                      |      |      | 0.51                  | (39)              |      |      | 0.46 | (58)              |
| Male                        |     |                     |      | 0.62 | (31)                      |      |      | 0.49                  | (38)              |      |      | 0.54 | (69)              |

- Fatty infiltration and cross-sectional area are excluded due to high percent of missingness.

.  $a$   $b$   $c$  represent the lower quartile  $a$ , the median  $b$ , and the upper quartile  $c$  for continuous variables.  $x \pm s$  represents  $\bar{X} \pm 1$  SD.  $N$  is the number of non-missing values. Numbers after proportions are frequencies.

|                                | N   | Surgery<br>$N = 50$ |      |                           | Non-operative<br>$N = 77$ |      |                          | Combined<br>$N = 127$ |      |                           |
|--------------------------------|-----|---------------------|------|---------------------------|---------------------------|------|--------------------------|-----------------------|------|---------------------------|
| Infraspinatus                  | 127 |                     |      |                           |                           |      |                          |                       |      |                           |
| No tear                        |     | 0.58                | (29) |                           | 0.58                      | (45) |                          | 0.58                  | (74) |                           |
| Full/partial thickness tear    |     | 0.38                | (19) |                           | 0.22                      | (17) |                          | 0.28                  | (36) |                           |
| NA                             |     | 0.04                | ( 2) |                           | 0.19                      | (15) |                          | 0.13                  | (17) |                           |
| Is dominant shoulder affected? | 127 |                     |      |                           |                           |      |                          |                       |      |                           |
| No                             |     | 0.22                | (11) |                           | 0.23                      | (18) |                          | 0.23                  | (29) |                           |
| Yes                            |     | 0.74                | (37) |                           | 0.71                      | (55) |                          | 0.72                  | (92) |                           |
| NA                             |     | 0.04                | ( 2) |                           | 0.05                      | ( 4) |                          | 0.05                  | ( 6) |                           |
| Isolated Abduction Ratio       | 117 | 0.76                | 0.94 | 1.00 (0.87 $\pm$ 0.20)    | 0.80                      | 0.94 | 1.00 (0.89 $\pm$ 0.18)   | 0.79                  | 0.94 | 1.00 (0.88 $\pm$ 0.19)    |
| Marital status                 | 127 |                     |      |                           |                           |      |                          |                       |      |                           |
| Single/Divorced/Widowed        |     | 0.22                | (11) |                           | 0.27                      | (21) |                          | 0.25                  | (32) |                           |
| Married                        |     | 0.78                | (39) |                           | 0.70                      | (54) |                          | 0.73                  | (93) |                           |
| NA                             |     | 0.00                | ( 0) |                           | 0.03                      | ( 2) |                          | 0.02                  | ( 2) |                           |
| MHI-5                          | 125 | 76                  | 85   | 90 (80 $\pm$ 17)          | 75                        | 85   | 90 (80 $\pm$ 15)         | 75                    | 85   | 90 (80 $\pm$ 16)          |
| Number of comorbidities        | 127 |                     |      |                           |                           |      |                          |                       |      |                           |
| $\leq 1$                       |     | 0.58                | (29) |                           | 0.44                      | (34) |                          | 0.50                  | (63) |                           |
| $> 1$                          |     | 0.42                | (21) |                           | 0.56                      | (43) |                          | 0.50                  | (64) |                           |
| Number of torn                 | 127 |                     |      |                           |                           |      |                          |                       |      |                           |
| 0 or 1                         |     | 0.58                | (29) |                           | 0.57                      | (44) |                          | 0.57                  | (73) |                           |
| 2 or 3                         |     | 0.38                | (19) |                           | 0.23                      | (18) |                          | 0.29                  | (37) |                           |
| NA                             |     | 0.04                | ( 2) |                           | 0.19                      | (15) |                          | 0.13                  | (17) |                           |
| Smoking status                 | 127 |                     |      |                           |                           |      |                          |                       |      |                           |
| Never                          |     | 0.48                | (24) |                           | 0.48                      | (37) |                          | 0.48                  | (61) |                           |
| Past/current                   |     | 0.48                | (24) |                           | 0.51                      | (39) |                          | 0.50                  | (63) |                           |
| NA                             |     | 0.04                | ( 2) |                           | 0.01                      | ( 1) |                          | 0.02                  | ( 3) |                           |
| Trauma                         | 127 |                     |      |                           |                           |      |                          |                       |      |                           |
| No                             |     | 0.46                | (23) |                           | 0.55                      | (42) |                          | 0.51                  | (65) |                           |
| Yes                            |     | 0.54                | (27) |                           | 0.38                      | (29) |                          | 0.44                  | (56) |                           |
| NA                             |     | 0.00                | ( 0) |                           | 0.08                      | ( 6) |                          | 0.05                  | ( 6) |                           |
| When did problem start?        | 122 | 2.2                 | 6.0  | 18.0 (22.6 $\pm$ 40.6)    | 4.0                       | 6.0  | 18.0 (24.9 $\pm$ 54.3)   | 3.2                   | 6.0  | 18.0 (23.9 $\pm$ 49.0)    |
| ASES at Baseline               | 123 | 42                  | 60   | 68 (57 $\pm$ 18)          | 34                        | 48   | 59 (46 $\pm$ 19)         | 38                    | 51   | 63 (50 $\pm$ 19)          |
| Cross-sectional area           | 100 | 1.82                | 3.23 | 20.86 (14.48 $\pm$ 19.35) | 0.00                      | 0.72 | 4.40 ( 7.93 $\pm$ 15.34) | 0.00                  | 2.21 | 12.03 (10.88 $\pm$ 17.48) |
| Full tear of any tendons?      | 127 |                     |      |                           |                           |      |                          |                       |      |                           |
| No                             |     | 0.10                | ( 5) |                           | 0.36                      | (28) |                          | 0.26                  | (33) |                           |
| Yes                            |     | 0.86                | (43) |                           | 0.44                      | (34) |                          | 0.61                  | (77) |                           |
| NA                             |     | 0.04                | ( 2) |                           | 0.19                      | (15) |                          | 0.13                  | (17) |                           |
| Patient expectation            | 127 |                     |      |                           |                           |      |                          |                       |      |                           |
| A great improvement            |     | 0.94                | (47) |                           | 0.64                      | (49) |                          | 0.76                  | (96) |                           |
| Other                          |     | 0.06                | ( 3) |                           | 0.34                      | (26) |                          | 0.23                  | (29) |                           |
| NA                             |     | 0.00                | ( 0) |                           | 0.03                      | ( 2) |                          | 0.02                  | ( 2) |                           |

### 3 ASES and ASES Change by Visit

|              | Baseline       |      |       | 3 Month        |      |      | 6 Month       |              |      | 12 Month      |       |              | 18 Month      |      |       |              |     |      |       |              |
|--------------|----------------|------|-------|----------------|------|------|---------------|--------------|------|---------------|-------|--------------|---------------|------|-------|--------------|-----|------|-------|--------------|
|              | <i>N</i> = 127 |      |       | <i>N</i> = 109 |      |      | <i>N</i> = 93 |              |      | <i>N</i> = 93 |       |              | <i>N</i> = 82 |      |       |              |     |      |       |              |
| ASES (0-100) | 37.7           | 51.2 | 63.1  | (50.3 ±18.8)   | 28.8 | 37.9 | 55.7          | (40.5 ±20.1) | 12.7 | 26.2          | 41.6  | (28.1 ±19.5) | 2.0           | 15.0 | 32.7  | (19.9 ±19.4) | 2.6 | 11.7 | 24.1  | (17.5 ±18.1) |
| ASES_30      |                |      |       |                |      |      |               |              |      |               |       |              |               |      |       |              |     |      |       |              |
| 0            | 97%            |      | (123) |                | 54%  |      | ( 59)         |              | 35%  |               | ( 33) |              | 22%           |      | ( 20) |              | 20% |      | ( 16) |              |
| 1            | 0%             |      | ( 0)  |                | 39%  |      | ( 42)         |              | 58%  |               | ( 54) |              | 67%           |      | ( 62) |              | 73% |      | ( 60) |              |
| NA           | 3%             |      | ( 4)  |                | 7%   |      | ( 8)          |              | 6%   |               | ( 6)  |              | 12%           |      | ( 11) |              | 7%  |      | ( 6)  |              |
| ASES_50      |                |      |       |                |      |      |               |              |      |               |       |              |               |      |       |              |     |      |       |              |
| 0            | 97%            |      | (123) |                | 72%  |      | ( 78)         |              | 53%  |               | ( 49) |              | 32%           |      | ( 30) |              | 27% |      | ( 22) |              |
| 1            | 0%             |      | ( 0)  |                | 21%  |      | ( 23)         |              | 41%  |               | ( 38) |              | 56%           |      | ( 52) |              | 66% |      | ( 54) |              |
| NA           | 3%             |      | ( 4)  |                | 7%   |      | ( 8)          |              | 6%   |               | ( 6)  |              | 12%           |      | ( 11) |              | 7%  |      | ( 6)  |              |

*a b c* represent the lower quartile *a*, the median *b*, and the upper quartile *c* for continuous variables.  $x \pm s$  represents  $\bar{X} \pm 1$  SD. Numbers after percents are frequencies.

4

- Baseline ASES is included in MI and calculation of propensity score.
- Baseline ASES\_30 and ASES\_50 are constant (all zeros) and not included in MI and PS calculation.
- ASES\_30 measures the difference between ASES at follow-up visit and baseline. If the difference is greater than 30% of baseline ASES. ASES\_30 is 1. If the difference is less than 30% of baseline ASES. ASES\_30 is 0. If either baseline or follow-up ASES is missing, ASES\_30 is missing.
- ASES\_50 measures the difference between ASES at follow-up visit and baseline. If the difference is greater than 50% of baseline ASES. ASES\_50 is 1. If the difference is less than 50% of baseline ASES. ASES\_50 is 0. If either baseline or follow-up ASES is missing, ASES\_50 is missing.

#### 4 ASES Change Over Time by Treatment Groups (with 95% confidence interval)

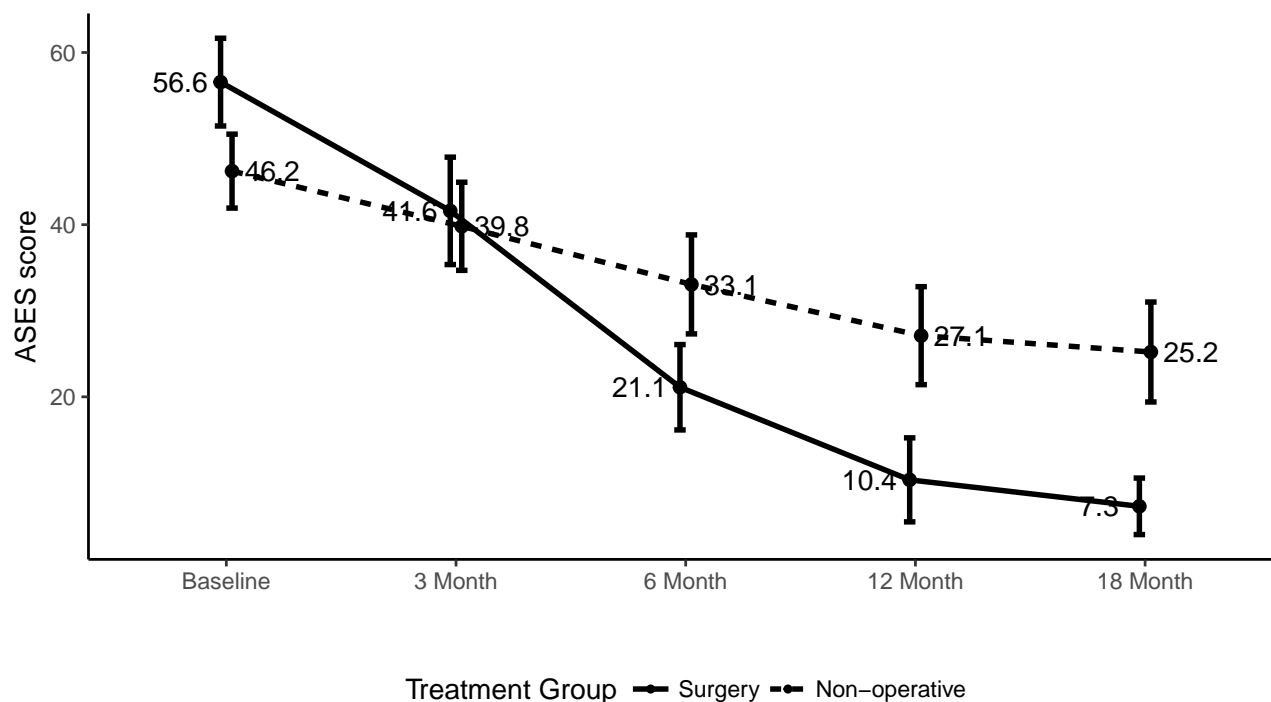

| tab      | Surgery | Non-operative | Difference | Lower CI | Upper CI | P value |
|----------|---------|---------------|------------|----------|----------|---------|
| Baseline | 56.562  | 46.223        | 10.340     | 3.389    | 17.333   | 0.003   |
| 3 Month  | 41.606  | 39.813        | 1.794      | -7.000   | 9.333    | 0.771   |
| 6 Month  | 21.113  | 33.062        | -11.949    | -20.500  | -3.750   | 0.005   |
| 12 Month | 10.355  | 27.106        | -16.751    | -23.463  | -8.667   | 0.000   |
| 18 Month | 7.282   | 25.209        | -17.927    | -21.333  | -7.950   | 0.000   |

#### 5 Multiple Imputation for Baseline Values

- Missingness in our dataset is Missing At Random (MAR).
- Multiple Imputation (MI) was implemented using the "aregImpute" function in *Hmisc* R package for predictor imputation.
- MI imputes missing variables using the Predictive Mean Matching (PMM) method with weighted probability sampling of available data. All 24 predictors, including baseline ASES, were included in MI procedure. ASES at follow-up and treatment information were not included in MI.
- MI was repeated for 20 times to account for potential variability introduced by imputation. All imputed "complete" datasets were saved.

## 6 Model Probability of Treatment (Propensity Score)

### 6.1 Calculation of Propensity Score

- The propensity score is each patient's predicted probability of being assigned to surgical group, given the estimates from the logit model. Covariates that are related to both the treatment assignments and potential outcomes are included. (all 24 covariates)

$$\begin{aligned} \text{logit}(e_i) = & \beta_0 + \beta_1 * \text{age}_i + \beta_2 * \text{BicepsTendonitis}_i + \beta_3 * \text{Boileau}_i + \beta_4 * \text{DailyShoulderUseAtWork}_i \\ & + \beta_5 * \text{DoYouDrinkAlcohol}_i + \beta_6 * \text{Education}_i + \beta_7 * \text{ExternalRotationRatio}_i + \beta_8 * \text{FABQ}_i \\ & + \beta_9 * \text{FattyInfiltration}_i + \beta_{10} * \text{Gender}_i + \beta_{11} * \text{Infraspinatus}_i + \beta_{12} * \text{DominantAffected}_i \\ & + \beta_{13} * \text{IsolatedAbductionRatio}_i + \beta_{14} * \text{MaritalStatus}_i + \beta_{15} * \text{MHI}_i + \beta_{16} * \text{Comorbidities}_i \\ & + \beta_{17} * \text{NumOfTorn}_i + \beta_{18} * \text{SmokingStatus}_i + \beta_{19} * \text{Trauma}_i + \beta_{20} * \text{SymptomDuration}_i \\ & + \beta_{21} * \text{BaselineASES}_i + \beta_{22} * \text{CrossArea}_i + \beta_{23} * \text{FullTear}_i + \beta_{24} * \text{Expectation}_i \end{aligned}$$

- Final propensity score is the average predicted value from all imputation datasets.
- Restrict cubic splines were not applied on continuous variables.

### 6.2 Calculation of Matching Weights

- Matched weights for treatment group:

$$\min\{e_i, 1 - e_i\}/e_i$$

- Matched weights for control group:

$$\min\{e_i, 1 - e_i\}/(1 - e_i)$$

### 6.3 Plots of Estimated Propensity Score and Matching Weights by Treatment

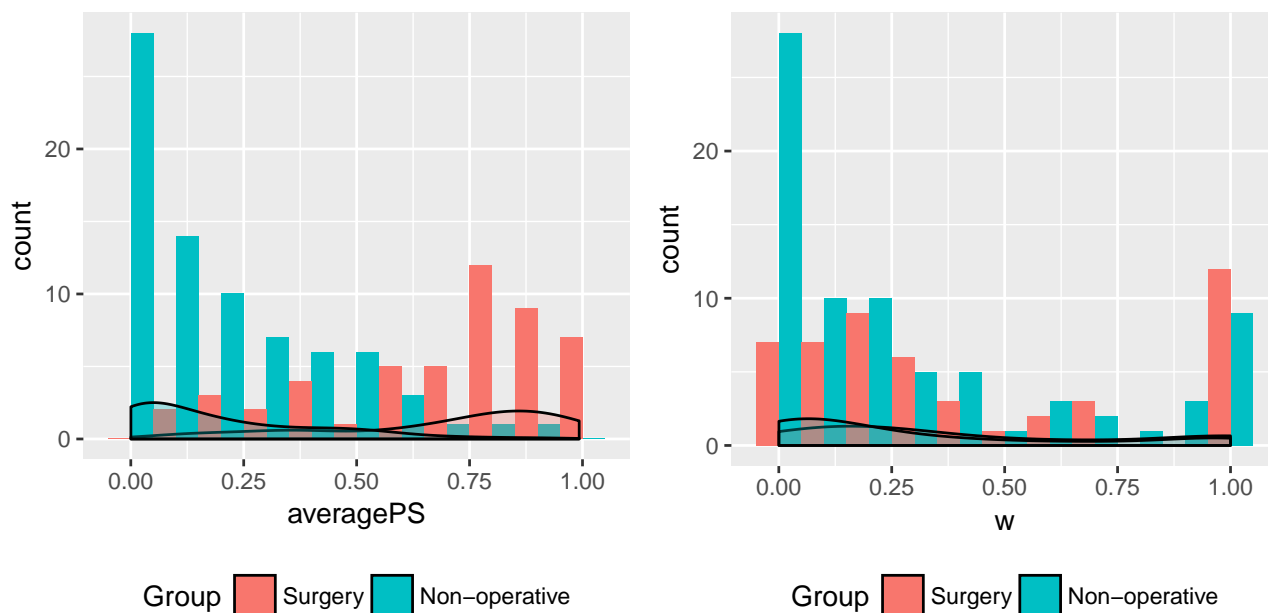

### 6.4 Summary Table after Weighting

|                                     |   | before weighting |               |       | after weighting |               |       |
|-------------------------------------|---|------------------|---------------|-------|-----------------|---------------|-------|
|                                     |   | Surgery          | Non-operative | SMD   | Surgery         | Non-operative | SMD   |
| Age (mean(sd))                      |   | 59.89 (8.65)     | 62.87 (8.45)  | 0.534 | 62.40 (7.87)    | 59.13 (6.92)  | 0.044 |
| Biceps tendonitis/tenosynovitis (%) | 1 | 35.0 (70.0)      | 54.0 (70.1)   | 0.003 | 15.1 (71.1)     | 16.5 (72.2)   | 0.024 |
|                                     | 2 | 15.0 (30.0)      | 23.0 (29.9)   |       | 6.1 (28.9)      | 6.4 (27.8)    |       |
| Boileau (%)                         | 1 | 29.0 (60.4)      | 49.0 (79.0)   | 0.414 | 13.3 (67.1)     | 12.5 (64.1)   | 0.062 |
|                                     | 2 | 19.0 (39.6)      | 13.0 (21.0)   |       | 6.6 (32.9)      | 7.0 (35.9)    |       |
| Daily shoulder use at work (%)      | 1 | 37.0 (75.5)      | 63.0 (81.8)   | 0.154 | 16.2 (78.4)     | 17.6 (76.9)   | 0.036 |
|                                     | 2 | 12.0 (24.5)      | 14.0 (18.2)   |       | 4.5 (21.6)      | 5.3 (23.1)    |       |
| Do you drink alcohol? (%)           | 1 | 18.0 (37.5)      | 43.0 (56.6)   | 0.389 | 10.0 (48.9)     | 11.3 (49.7)   | 0.017 |
|                                     | 2 | 30.0 (62.5)      | 33.0 (43.4)   |       | 10.5 (51.1)     | 11.4 (50.3)   |       |
| Education (%)                       | 1 | 16.0 (33.3)      | 26.0 (34.2)   | 0.019 | 5.8 (28.6)      | 7.7 (33.8)    | 0.114 |
|                                     | 2 | 32.0 (66.7)      | 50.0 (65.8)   |       | 14.6 (71.4)     | 15.0 (66.2)   |       |
| external rotation ratio (mean(sd))  |   | 0.52 (0.30)      | 0.83 (0.42)   | 0.768 | 0.65 (0.34)     | 0.71 (0.28)   | 0.172 |
| FABQ (mean(sd))                     |   | 18.89 (4.30)     | 16.55 (6.03)  | 0.495 | 18.08 (4.23)    | 17.89 (4.95)  | 0.023 |
| Fatty infiltration (%)              | 1 | 23.0 (54.8)      | 41.0 (71.9)   | 0.362 | 9.4 (54.5)      | 11.1 (62.6)   | 0.166 |
|                                     | 2 | 19.0 (45.2)      | 16.0 (28.1)   |       | 7.8 (45.5)      | 6.6 (37.4)    |       |
| Gender (%)                          | 1 | 19.0 (38.0)      | 39.0 (50.6)   | 0.257 | 10.5 (49.7)     | 10.4 (45.3)   | 0.088 |
|                                     | 2 | 31.0 (62.0)      | 38.0 (49.4)   |       | 10.7 (50.3)     | 12.5 (54.7)   |       |
| Infraspinatus (%)                   | 1 | 29.0 (60.4)      | 45.0 (72.6)   | 0.260 | 11.3 (56.8)     | 11.3 (58.1)   | 0.025 |
|                                     | 2 | 19.0 (39.6)      | 17.0 (27.4)   |       | 8.6 (43.2)      | 8.2 (41.9)    |       |
| Is dominant shoulder affected? (%)  | 1 | 11.0 (22.9)      | 18.0 (24.7)   | 0.041 | 5.4 (27.1)      | 6.2 (29.1)    | 0.045 |
|                                     | 2 | 37.0 (77.1)      | 55.0 (75.3)   |       | 14.7 (72.9)     | 15.2 (70.9)   |       |
| Isolated abduction ratio (mean(sd)) |   | 0.86 (0.21)      | 0.87 (0.19)   | 0.110 | 0.88 (0.20)     | 0.92 (0.16)   | 0.031 |
| Marital status (%)                  | 1 | 11.0 (22.0)      | 21.0 (28.0)   | 0.139 | 5.1 (24.1)      | 5.2 (23.1)    | 0.023 |
|                                     | 2 | 39.0 (78.0)      | 54.0 (72.0)   |       | 16.1 (75.9)     | 17.4 (76.9)   |       |
| MHI-5 (mean(sd))                    |   | 80.24 (18.82)    | 81.02 (13.93) | 0.013 | 78.95 (20.56)   | 84.29 (8.46)  | 0.051 |
| Number of Comorbidities (%)         | 1 | 29.0 (58.0)      | 34.0 (44.2)   | 0.280 | 10.8 (51.0)     | 12.3 (53.7)   | 0.055 |
|                                     | 2 | 21.0 (42.0)      | 43.0 (55.8)   |       | 10.4 (49.0)     | 10.6 (46.3)   |       |
| Number of torn (%)                  | 1 | 29.0 (60.4)      | 44.0 (71.0)   | 0.224 | 11.2 (56.2)     | 11.3 (58.0)   | 0.036 |
|                                     | 2 | 19.0 (39.6)      | 18.0 (29.0)   |       | 8.7 (43.8)      | 8.2 (42.0)    |       |
| Smoking Status (%)                  | 1 | 24.0 (50.0)      | 37.0 (48.7)   | 0.026 | 9.1 (44.4)      | 10.4 (45.9)   | 0.029 |
|                                     | 2 | 24.0 (50.0)      | 39.0 (51.3)   |       | 11.4 (55.6)     | 12.3 (54.1)   |       |
| Trauma (%)                          | 1 | 23.0 (46.0)      | 42.0 (59.2)   | 0.266 | 11.1 (52.2)     | 9.7 (49.0)    | 0.064 |
|                                     | 2 | 27.0 (54.0)      | 29.0 (40.8)   |       | 10.1 (47.8)     | 10.1 (51.0)   |       |
| Symptom Duration (mean(sd))         |   | 24.27 (43.52)    | 22.78 (42.14) | 0.048 | 25.84 (48.47)   | 29.01 (53.97) | 0.013 |
| ASES at baseline (mean(sd))         |   | 58.53 (16.18)    | 45.82 (17.20) | 0.570 | 54.25 (13.97)   | 45.86 (18.07) | 0.026 |
| Cross-sectional Area (mean(sd))     |   | 14.73 (19.29)    | 8.02 (16.15)  | 0.376 | 12.79 (20.99)   | 18.81 (23.73) | 0.122 |
| Full tear of any tendons? (%)       | 1 | 5.0 (10.4)       | 28.0 (45.2)   | 0.841 | 4.2 (21.0)      | 4.2 (21.3)    | 0.007 |
|                                     | 2 | 43.0 (89.6)      | 34.0 (54.8)   |       | 15.7 (79.0)     | 15.4 (78.7)   |       |
| Patient Expectation (%)             | 1 | 47.0 (94.0)      | 49.0 (65.3)   | 0.762 | 18.5 (87.2)     | 19.7 (86.2)   | 0.030 |
|                                     | 2 | 3.0 ( 6.0)       | 26.0 (34.7)   |       | 2.7 (12.8)      | 3.2 (13.8)    |       |

## 7 Linear Mixed Effect Model with Weighted Propensity Score

### 7.1 Identify the Best Model of ASES Over Time

- Model 1:  $ases \sim visit + visit^2$ , numeric visit, compound symmetry correlation structure. AIC for model 1 is 3565.77.
- Model 2:  $ases \sim visit + visit^2$ , numeric visit, AR(1) Correlation Structure. AIC for model 2 is 3618.15.
- Model 3:  $ases \sim visit + visit^2$ , numeric visit, unstructured correlation. AIC for model 3 is 3501.71.
- Model 4:  $ases \sim visit$ , visit as factor variable, compound symmetry correlation structure. AIC for model 4 is 3562.6.
- Model 5:  $ases \sim visit$ , visit as factor variable, AR(1) Correlation Structure. AIC for model 5 is 3611.91.
- Model 6:  $ases \sim visit$ , visit as factor variable, unstructured correlation. AIC for model 6 is 3494.55.
- The model with factor visit and unstructured correlation structure (general correlation structure) yields smallest AIC.



## 7.2 Model Fit with Treatment and Weight

### 7.2.1 No interaction model

```
##               lower  est.  upper p.value
## (Intercept)    22.39 27.71  33.0  0.000
## visit_new6 Month    -2.24  0.24  2.7  0.848
## visit_new12 Month   -9.27 -6.10 -2.9  0.000
## visit_new18 Month  -12.96 -9.71 -6.5  0.000
## operative_newNon-operative  0.72  7.34 14.0  0.031
```

### 7.2.2 Model with interaction

```
##               lower  est.  upper p.value
## (Intercept)      35  44.1  53.05  0.000
## visit_new6 Month  -35 -23.4 -12.03  0.000
## visit_new12 Month -48 -33.7 -19.04  0.000
## visit_new18 Month -55 -40.3 -25.43  0.000
## operative_newNon-operative -20 -9.9  0.11  0.055
## visit_new6 Month:operative_newNon-operative  13  24.7  36.32  0.000
## visit_new12 Month:operative_newNon-operative  14  28.9  43.93  0.000
## visit_new18 Month:operative_newNon-operative  17  32.1  47.34  0.000
```

### 7.2.3 Model comparison

```
##           Model df  AIC  BIC logLik  Test L.Ratio p-value
## finalfit1     1 13 3492 3542 -1733
## finalfit2     2 16 3477 3539 -1722 1 vs 2     21  1e-04
```

- finalfit1 is the no interaction model and finalfit2 is the interaction model.
- Model with visit and treatment interaction is the final model.

### 7.3 Residual Plot of Final Model

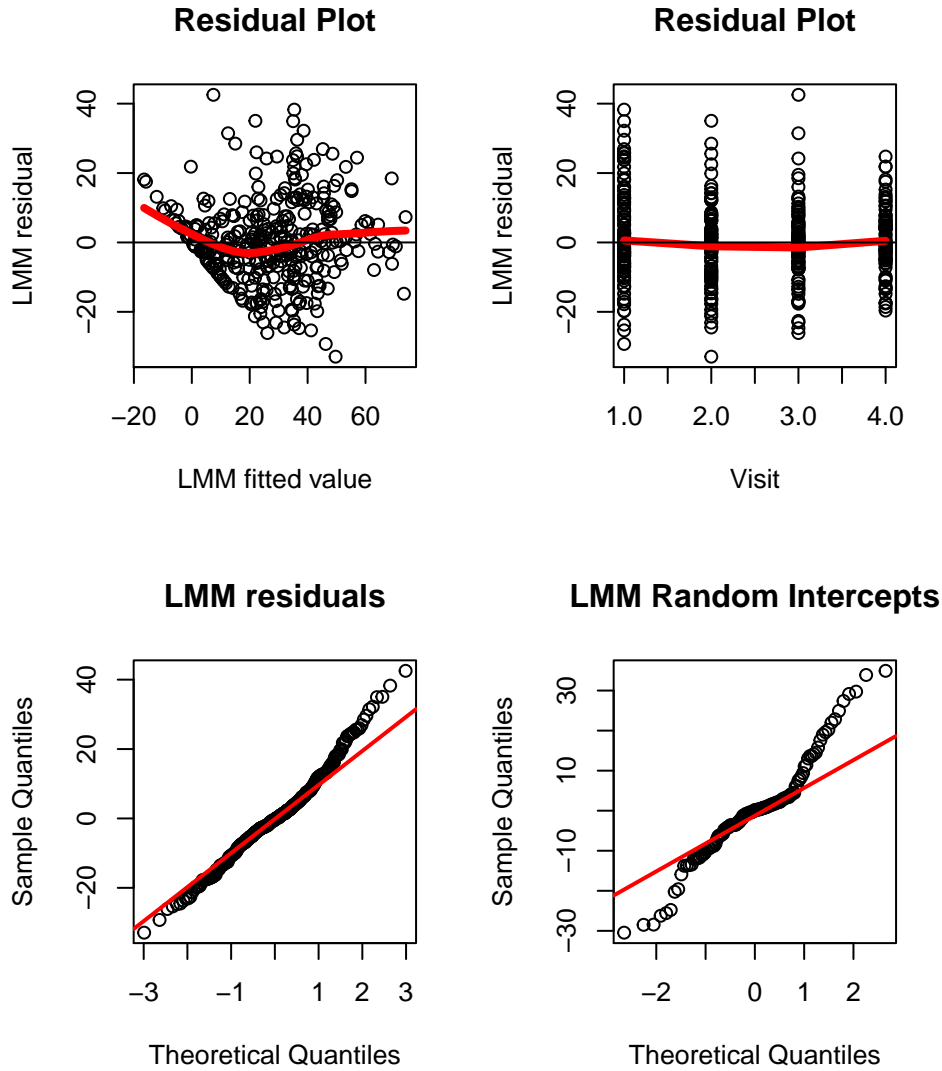

- Anderson-Darling normality test for LMM residuals is  $1.04 \times 10^{-4}$ .
- Anderson-Darling normality test for LMM random intercepts is  $1.27 \times 10^{-6}$ .

## 7.4 LS Means for Difference Between Operative and Non-operative Groups in Final Model

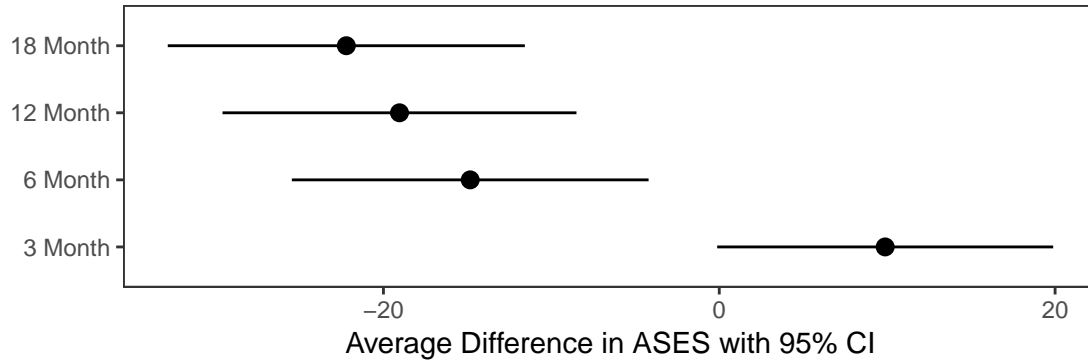

| contrast                | visit <sub>n</sub> ew | estimate | SE  | df  | t.ratio | p.value | upper | lower  |
|-------------------------|-----------------------|----------|-----|-----|---------|---------|-------|--------|
| Surgery - Non-operative | 3 Month               | 9.9      | 5.1 | 123 | 1.9     | 5.5e-02 | 19.9  | -0.12  |
| Surgery - Non-operative | 6 Month               | -14.8    | 5.4 | 123 | -2.7    | 7.1e-03 | -4.2  | -25.46 |
| Surgery - Non-operative | 12 Month              | -19.0    | 5.4 | 123 | -3.5    | 5.6e-04 | -8.5  | -29.58 |
| Surgery - Non-operative | 18 Month              | -22.2    | 5.4 | 123 | -4.1    | 7.6e-05 | -11.6 | -32.84 |

## 7.5 LS Means for Operative Group in Final Model

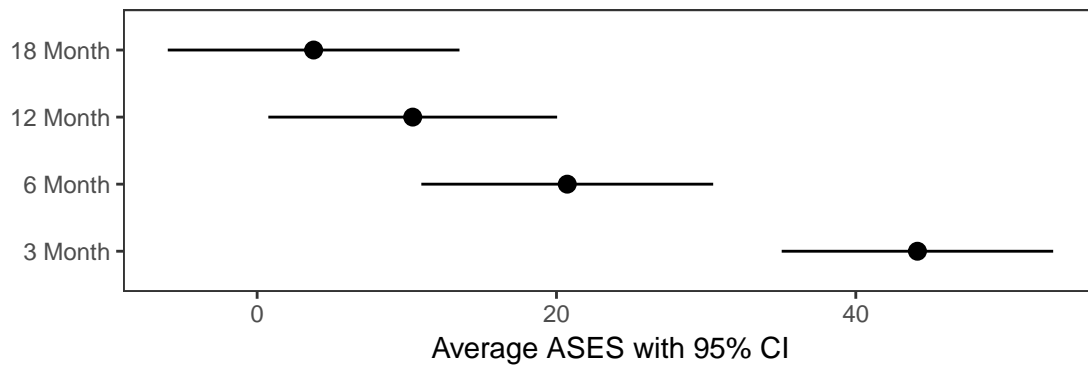

| operative <sub>n</sub> ew | visit <sub>n</sub> ew | lsmean | SE  | df  | lower.CL | upper.CL |
|---------------------------|-----------------------|--------|-----|-----|----------|----------|
| Surgery                   | 3 Month               | 44.1   | 4.6 | 124 | 35.05    | 53       |
| Surgery                   | 6 Month               | 20.7   | 4.9 | 124 | 10.97    | 30       |
| Surgery                   | 12 Month              | 10.4   | 4.9 | 124 | 0.75     | 20       |
| Surgery                   | 18 Month              | 3.8    | 4.9 | 124 | -5.97    | 14       |

## 7.6 LS Means for Non-operative Group in Final Model

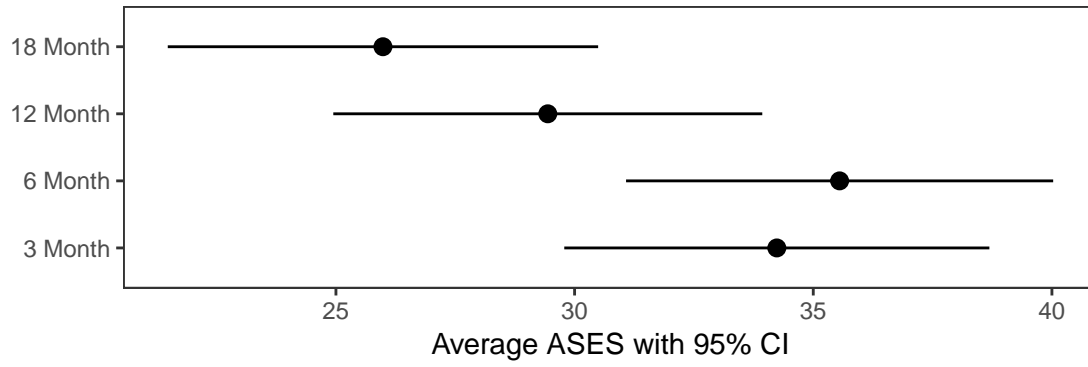

| <i>operative<sub>n</sub>ew</i> | <i>visit<sub>n</sub>ew</i> | lsmean | SE  | df  | lower.CL | upper.CL |
|--------------------------------|----------------------------|--------|-----|-----|----------|----------|
| Non-operative                  | 3 Month                    | 34     | 2.2 | 123 | 30       | 39       |
| Non-operative                  | 6 Month                    | 36     | 2.3 | 123 | 31       | 40       |
| Non-operative                  | 12 Month                   | 29     | 2.3 | 123 | 25       | 34       |
| Non-operative                  | 18 Month                   | 26     | 2.3 | 123 | 21       | 30       |

---

## 8 Linear Mixed Effect Model with Selected Variables

### 8.1 Selected Variables in Full Model

- Do you smoke
- Age
- Do you drink alcohol?
- Baseline ASES
- External rotatio ratio
- Daily shoulder use at work
- Trauma
- Fatty infiltration
- Number of torn
- MHI-5
- Patient expectation
- Full tear of any tendons?

## 8.2 Redundancy Analysis for Selected Variables at Baseline

```
##
## Redundancy Analysis
##
## redun(formula = ~baseases + pi_age + hx_f6_f + hx_e9_f + external.rotation.ratio +
##       fat_f + mhi + as.factor(torn_f) + hx_e8a_f + trauma_f + full_f +
##       hx_h1_f, data = dat1, r2 = 0.9, type = "adjusted", nk = 4)
##
## n: 83  p: 12  nk: 4
##
## Number of NAs: 44
## Frequencies of Missing Values Due to Each Variable
##
##       baseases                pi_age                hx_f6_f
##           4                    0                    1
##       hx_e9_f external.rotation.ratio                fat_f
##           3                    8                    28
##           mhi      as.factor(torn_f)                hx_e8a_f
##           2                    17                    3
##       trauma_f                full_f                hx_h1_f
##           6                    17                    2
##
##
## Transformation of target variables forced to be linear
##
## R-squared cutoff: 0.9  Type: adjusted
##
## R^2 with which each variable can be predicted from all other variables:
##
##       baseases                pi_age                hx_f6_f
##           0.058                0.154                0.002
##       hx_e9_f external.rotation.ratio                fat_f
##           0.000                0.085                0.424
##           mhi      as.factor(torn_f)                hx_e8a_f
##           0.100                0.256                0.017
##       trauma_f                full_f                hx_h1_f
##           0.042                0.119                0.012
##
## No redundant variables
```

- The predictor that can be predicted from the remaining set with the adjusted  $R^2$  higher than 0.9 is removed.
- There is no redundant variable.

### 8.3 Cluster Analysis for Selected Variables at Baseline

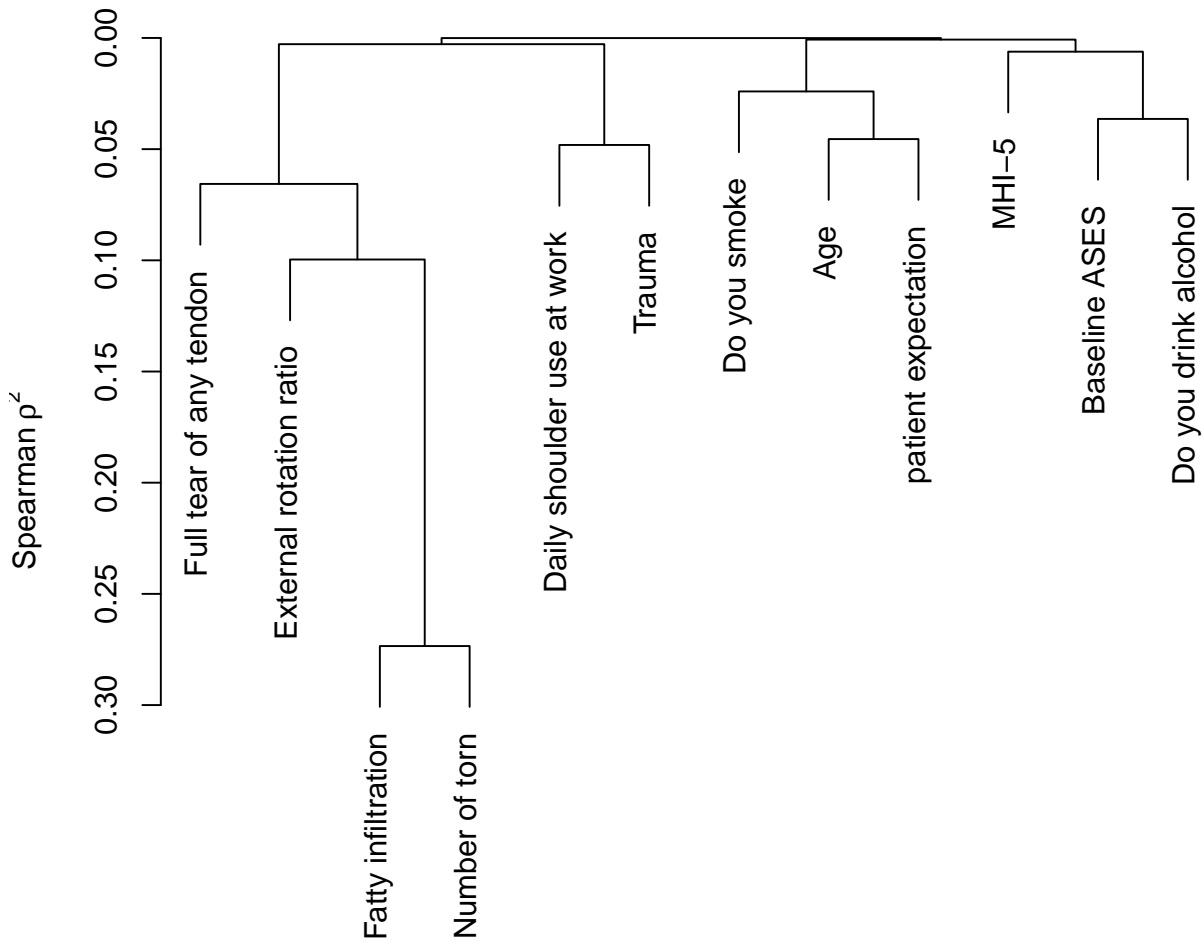

## 8.4 Model Fitting

| ##                                              | lower  | est.    | upper  | p.value |
|-------------------------------------------------|--------|---------|--------|---------|
| ## (Intercept)                                  | -26.32 | 8.978   | 44.28  | 0.631   |
| ## visit_new6 Month                             | -31.19 | -21.028 | -10.87 | 0.000   |
| ## visit_new12 Month                            | -42.65 | -28.251 | -13.86 | 0.000   |
| ## visit_new18 Month                            | -49.47 | -35.342 | -21.21 | 0.000   |
| ## operative_newNon-operative                   | -23.54 | -11.457 | 0.62   | 0.074   |
| ## baseases                                     | 0.14   | 0.325   | 0.51   | 0.001   |
| ## pi_age                                       | -0.23  | 0.158   | 0.55   | 0.444   |
| ## hx_f6_fHeavy/Moderate manual labor           | -2.69  | 5.411   | 13.51  | 0.206   |
| ## hx_e9_f1-2 times per week or more            | -12.69 | -5.494  | 1.70   | 0.149   |
| ## external.rotation.ratio                      | -4.08  | 3.642   | 11.36  | 0.371   |
| ## fat_fYes                                     | 3.15   | 11.001  | 18.85  | 0.009   |
| ## mhi                                          | -0.18  | 0.079   | 0.34   | 0.563   |
| ## torn_f2 or 3                                 | -6.93  | 0.669   | 8.27   | 0.867   |
| ## hx_e8a_fPast/current                         | -9.95  | -3.456  | 3.04   | 0.313   |
| ## trauma_fYes                                  | -5.74  | 0.580   | 6.90   | 0.861   |
| ## hx_h1_fOther                                 | -3.04  | 6.337   | 15.71  | 0.201   |
| ## full_fYes                                    | -12.96 | -4.313  | 4.33   | 0.344   |
| ## visit_new6 Month:operative_newNon-operative  | 13.22  | 23.696  | 34.17  | 0.000   |
| ## visit_new12 Month:operative_newNon-operative | 11.96  | 26.849  | 41.73  | 0.001   |
| ## visit_new18 Month:operative_newNon-operative | 16.24  | 30.840  | 45.44  | 0.000   |

- The AIC for model with compound symmetric correlation structure is 2340.
- The AIC for model with auto-regressive correlation structure is 2353.25.
- The AIC for model with general (unstructured) correlation structure is 2254.53.
- Model with general correlation structure is the final model.
- Number of Observations: 239
- Number of Groups: 82



## 8.5 Residual Plot of Final Model

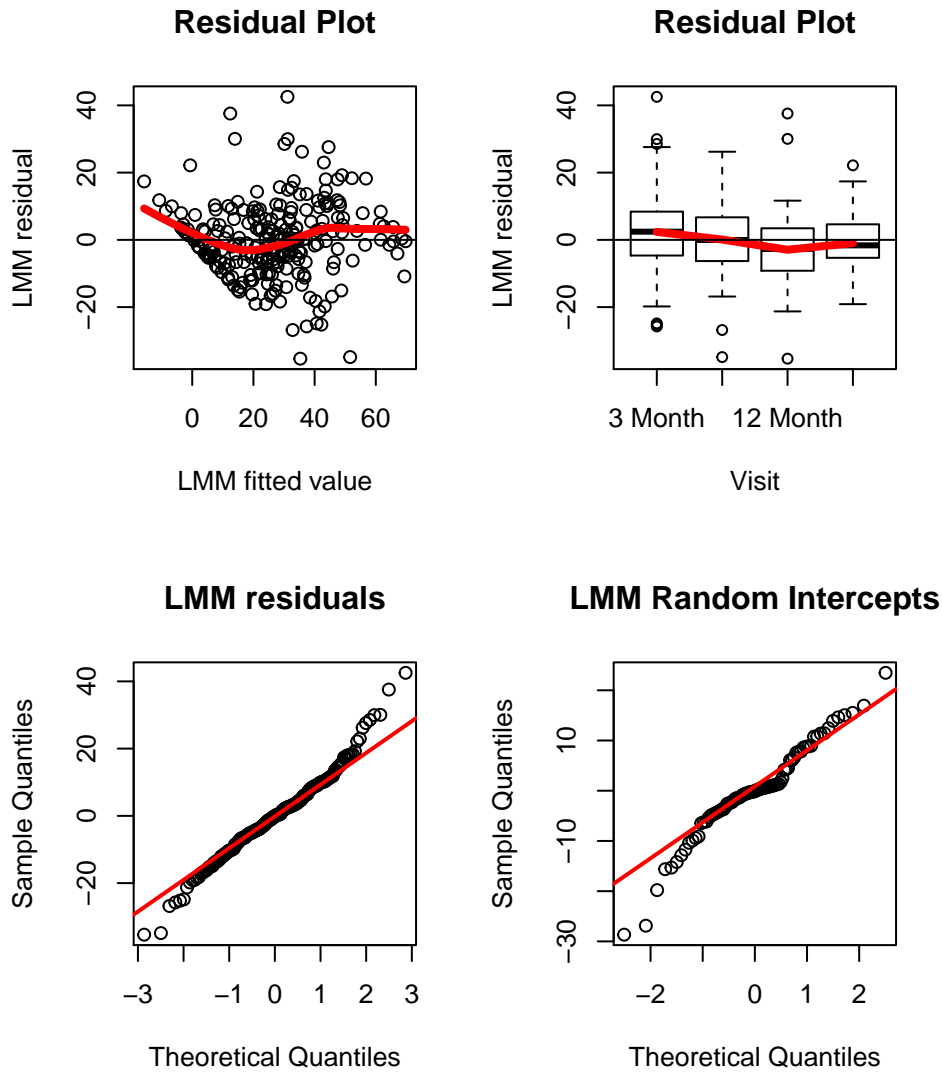

- Anderson-Darling normality test for LMM residuals is 0.01.
- Anderson-Darling normality test for LMM random intercepts is 0.

## 9 Comparison of ASES30 by Treatment

- If ASES\_30 of any follow-up visit is 1, ASES\_30\_comb is 1.
- If ASES\_30 of all follow-up visits are 0, ASES\_30\_comb is 0.
- If ASES\_30 is missing for all follow-up visits, ASES\_30\_comb is missing.

.  $N$  is the number of non-missing values. Numbers after proportions are frequencies.

|              | N   | Surgery   | Non-operative | Combined  |
|--------------|-----|-----------|---------------|-----------|
|              |     | $N = 50$  | $N = 77$      | $N = 127$ |
| ases.30_comb | 127 |           |               |           |
| 0            |     | 0.10 ( 5) | 0.35 (27)     | 0.25 (32) |
| 1            |     | 0.88 (44) | 0.61 (47)     | 0.72 (91) |
| NA           |     | 0.02 ( 1) | 0.04 ( 3)     | 0.03 ( 4) |

```
##           Surgery Non-operative
## ASES_30_comb=0      5          27
## ASES_30_comb=1     44          47
##
## Pearson's Chi-squared test with Yates' continuity correction
##
## data:  m
## X-squared = 9, df = 1, p-value = 0.002
```

## 10 Comparison of ASES50 by Treatment

- If ASES\_50 of any follow-up visit is 1, ASES\_50\_comb is 1.
- If ASES\_50 of all follow-up visits are 0, ASES\_50\_comb is 0.
- If ASES\_50 is missing for all follow-up visits, ASES\_50\_comb is missing.

.  $N$  is the number of non-missing values. Numbers after proportions are frequencies.

|              | N   | Surgery   | Non-operative | Combined  |
|--------------|-----|-----------|---------------|-----------|
|              |     | $N = 50$  | $N = 77$      | $N = 127$ |
| ases.50_comb | 127 |           |               |           |
| 0            |     | 0.14 ( 7) | 0.51 (39)     | 0.36 (46) |
| 1            |     | 0.84 (42) | 0.45 (35)     | 0.61 (77) |
| NA           |     | 0.02 ( 1) | 0.04 ( 3)     | 0.03 ( 4) |

```
##           Surgery Non-operative
## ASES_50_comb=0      7          39
## ASES_50_comb=1     42          35
##
## Pearson's Chi-squared test with Yates' continuity correction
##
## data:  m
## X-squared = 20, df = 1, p-value = 4e-05
```
